# Supplementary material
Source: MDPI journal article supplement (https://www.mdpi.com/search?q=materials-12-01019)

1 *Additional Material*

2

3 **Finite Element model updating combined with**  
4 **Multi-Response Optimization for Hyperelastic**  
5 **Materials Characterization**

6 **Saúl Íñiguez-Macedo <sup>1</sup>, Rubén Lostado-Lorza <sup>1,\*</sup> Rubén Escribano-García <sup>2</sup> and María Ángeles**  
7 **Martínez-Calvo <sup>1</sup>.**

8 <sup>1</sup> Department of Mechanical Engineering, University of La Rioja, 26004 Logroño, La Rioja, Spain;  
9 saul.iniguez@unirioja.es (S.I.M)

10 <sup>2</sup> IK4-LORTEK, 20240 Ordizia, Guipuzcoa, Spain; ruben.escribanogarcia@gmail.com

11 \* Correspondence: ruben.lostado@unirioja.es; Tel.: +34-941-299-527

12 Received: date; Accepted: date; Published: date

13

14

15

16 **S1. Standardized tests**

17 *S1.1. Tensile test*

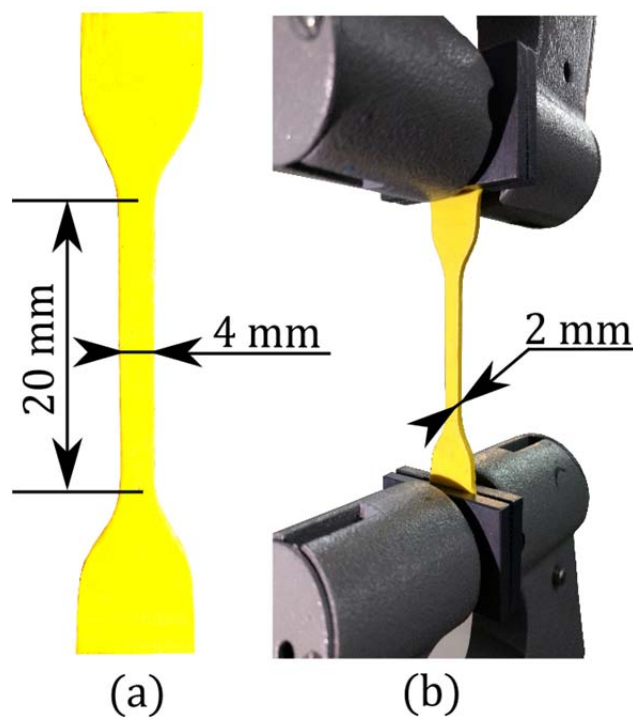

18

19

**Figure S1.** (a) Specimens ready for testing. (b) Specimen subjected to the tensile test.

20 *S1.2. Plane Stress test*

21

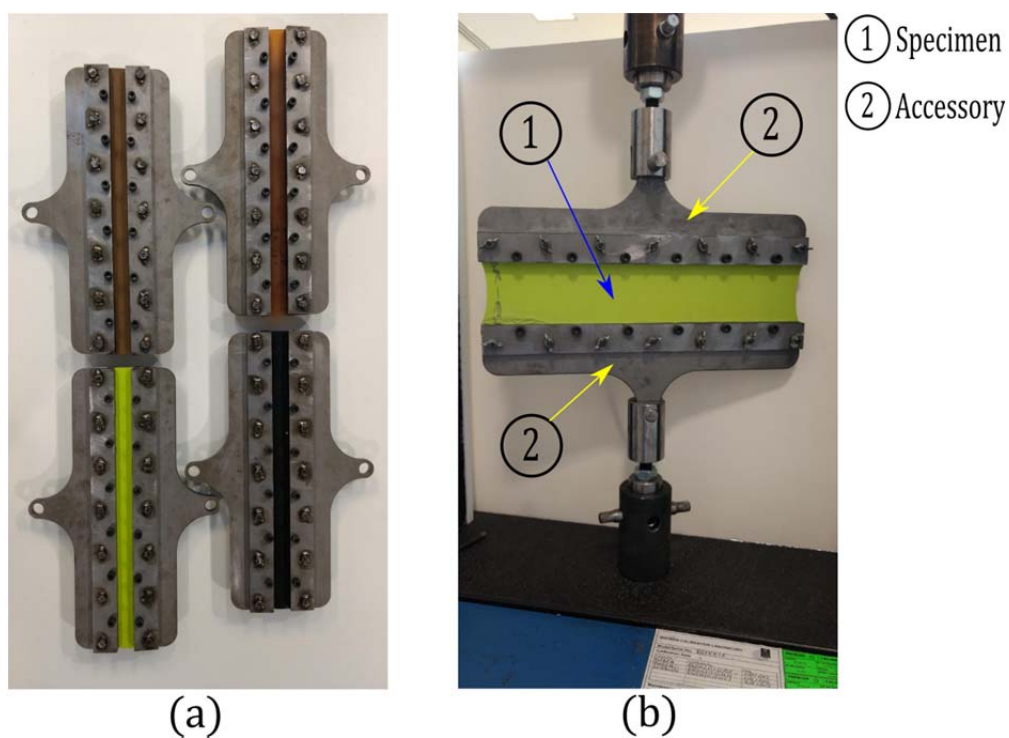

22

23

24

**Figure S2.** (a) Specimens mounted on the accessory designed for the plane stress test. (b) Development of this test in the tensile testing machine.

25

26 S1.3. Compression test

27

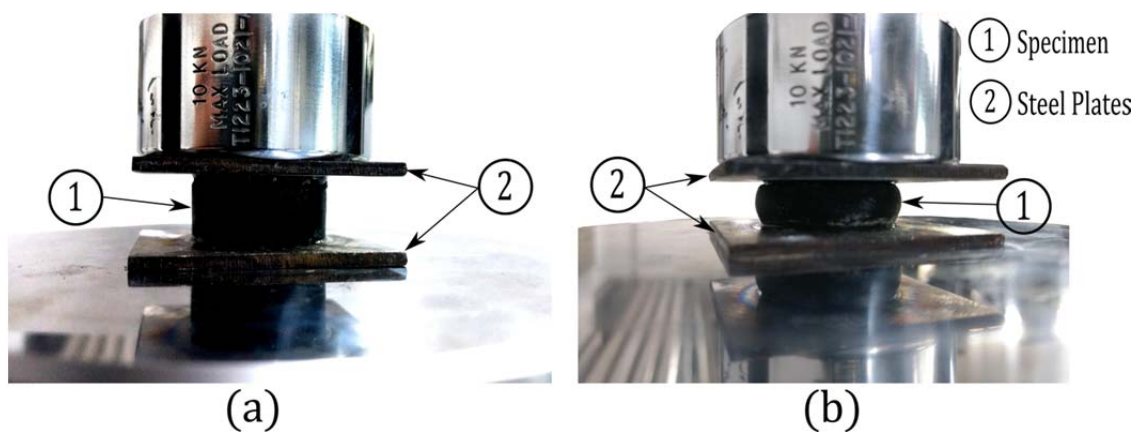

28

29 **Figure S3.** (a) Specimen glued to two parallel planes according to Method B. (b) Development of the  
30 compression test according to Method B in the tensile testing machine.

31 S1.4. Volumetric compression test

32

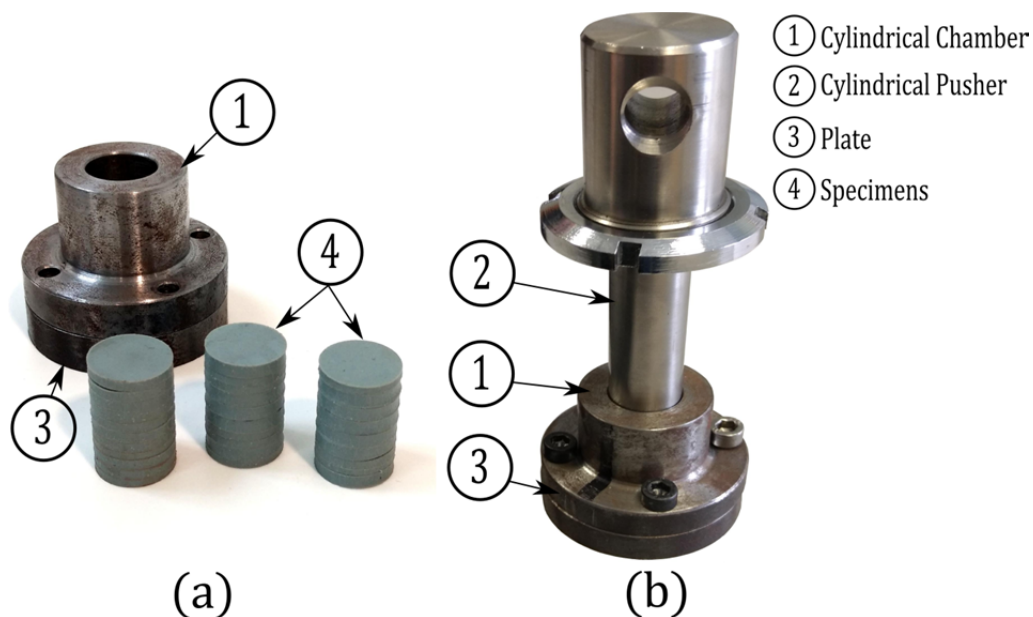

33

34 **Figure S4.** (a) Specimens ready for testing in the volumetric compression test and the cylindrical  
35 chamber with the plate. (b) Cylindrical chamber, the plate, the cylindrical pusher and the clamp.

36

37 S1.5. Shear test

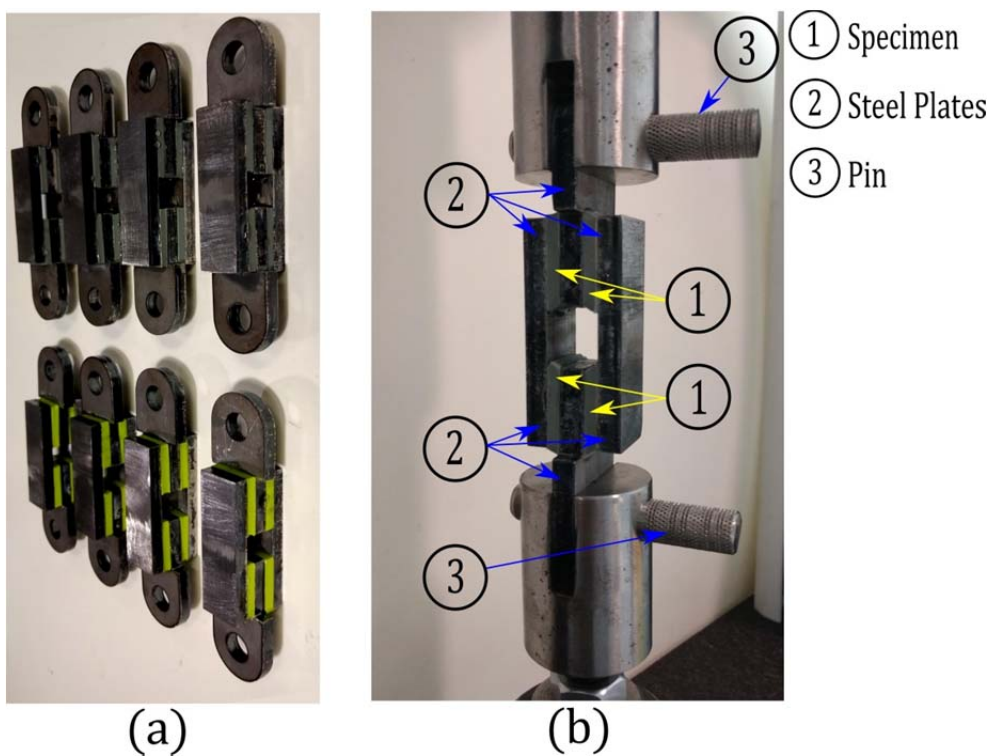

38

39

40

**Figure S5.** (a) Specimens ready for testing in the Shear test. Detail of the four steel plates and the four rubber parallelepipeds mounted on the testing machine.

41

42

## 43 S2. Finite Element Models Proposed

## 44 S2.1. Tensile test parameterized FE model

45

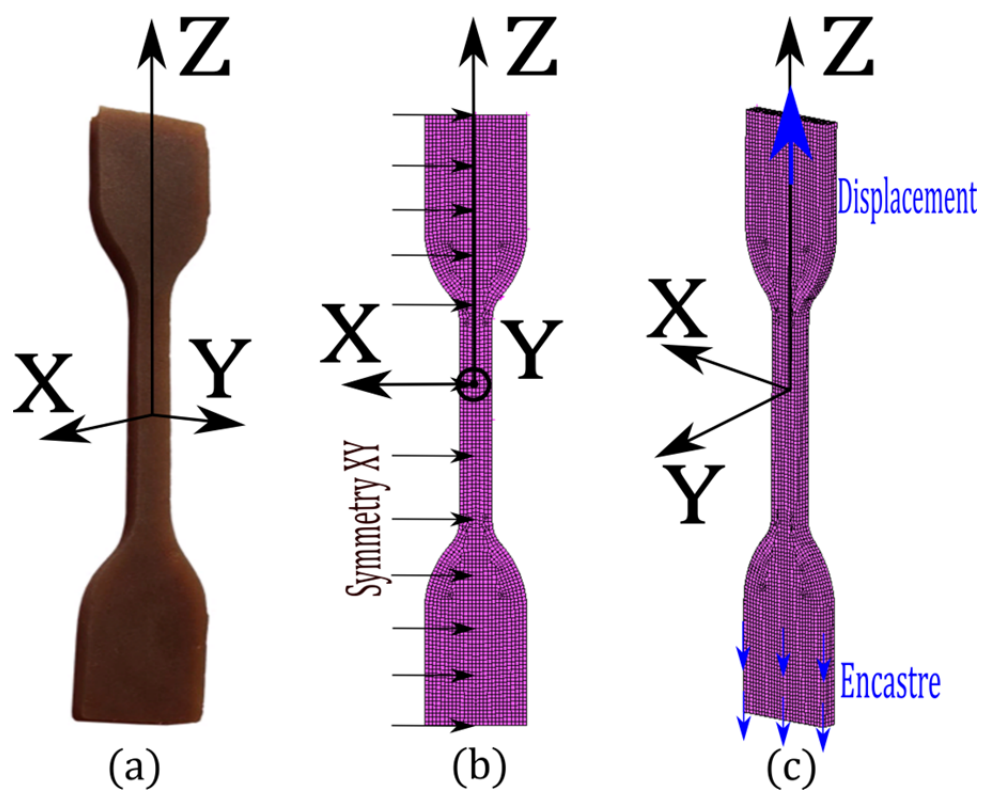

46

47 **Figure S6.** (a) Type 2 test specimen according to ISO 37:2017 [9]. (b) 3D FE model proposed with the  
48 symmetry condition imposed to facilitate its convergence. (c) Boundary conditions corresponding to  
49 the pneumatic fixing system of the jaws.

50

51 S2.2. Planar stress test parameterized FE model

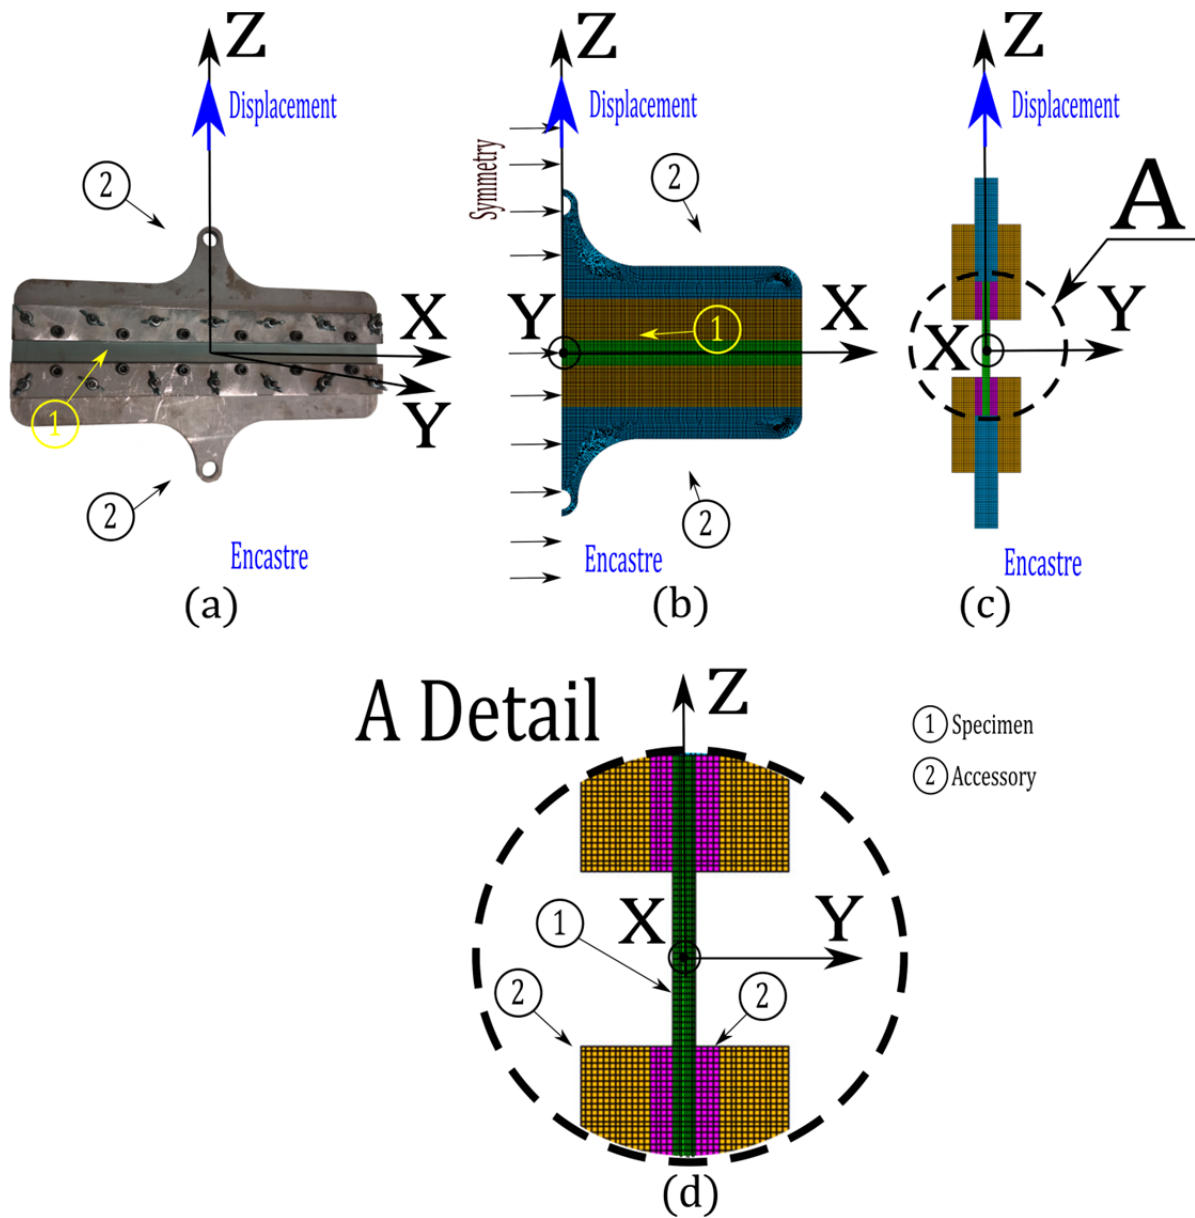

52

53

54

55

56

**Figure S7.** (a) Specimen mounted on the accessory designed to conduct the plane stress test. (b) Proposed parameterized symmetric FE model. (c) Displacement and symmetry conditions applied to the proposed FE model. (d) Detail of the specimen holder within the designed accessory.



57 S2.3. Compression test of the parameterized FE model

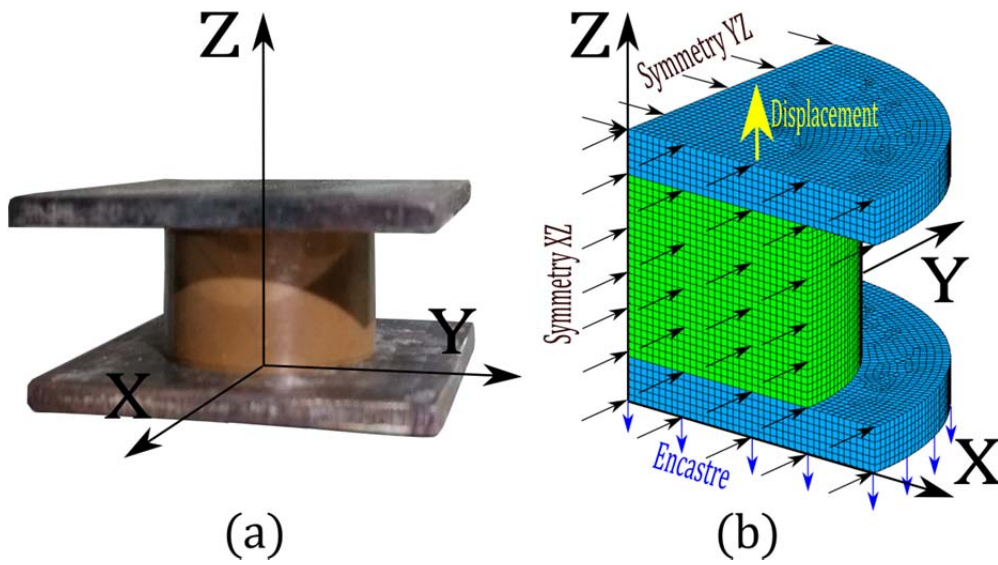

58  
59 **Figure S8.** (a) Specimen mounted on the steel sheets designed for the compression test. (b) A  
60 quarter of the FE Parameterized symmetric proposed FE model.  
61  
62

63 S2.4. Volumetric compression test parameterized FE model  
64

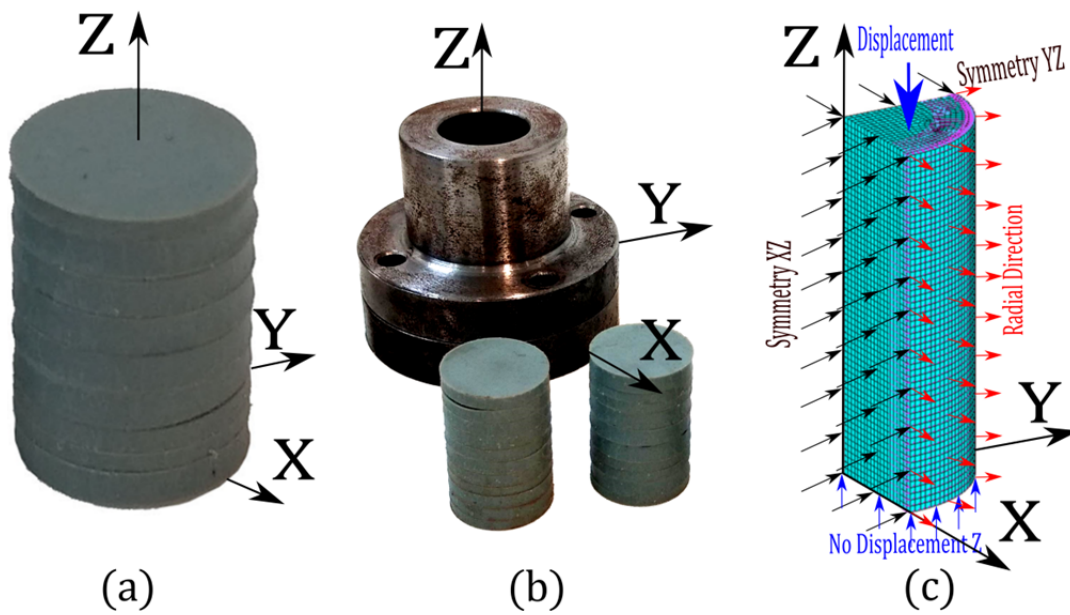

65  
66 **Figure S9.** (a) Specimen prepared for mounting on the cylindrical chamber. (b) Cylindrical chamber  
67 and specimens for testing. (c) The proposed parameterized symmetric FE model.  
68  
69  
70

71 **S3. Experimental Results**72 *S3.1. NBR Material*

73

74

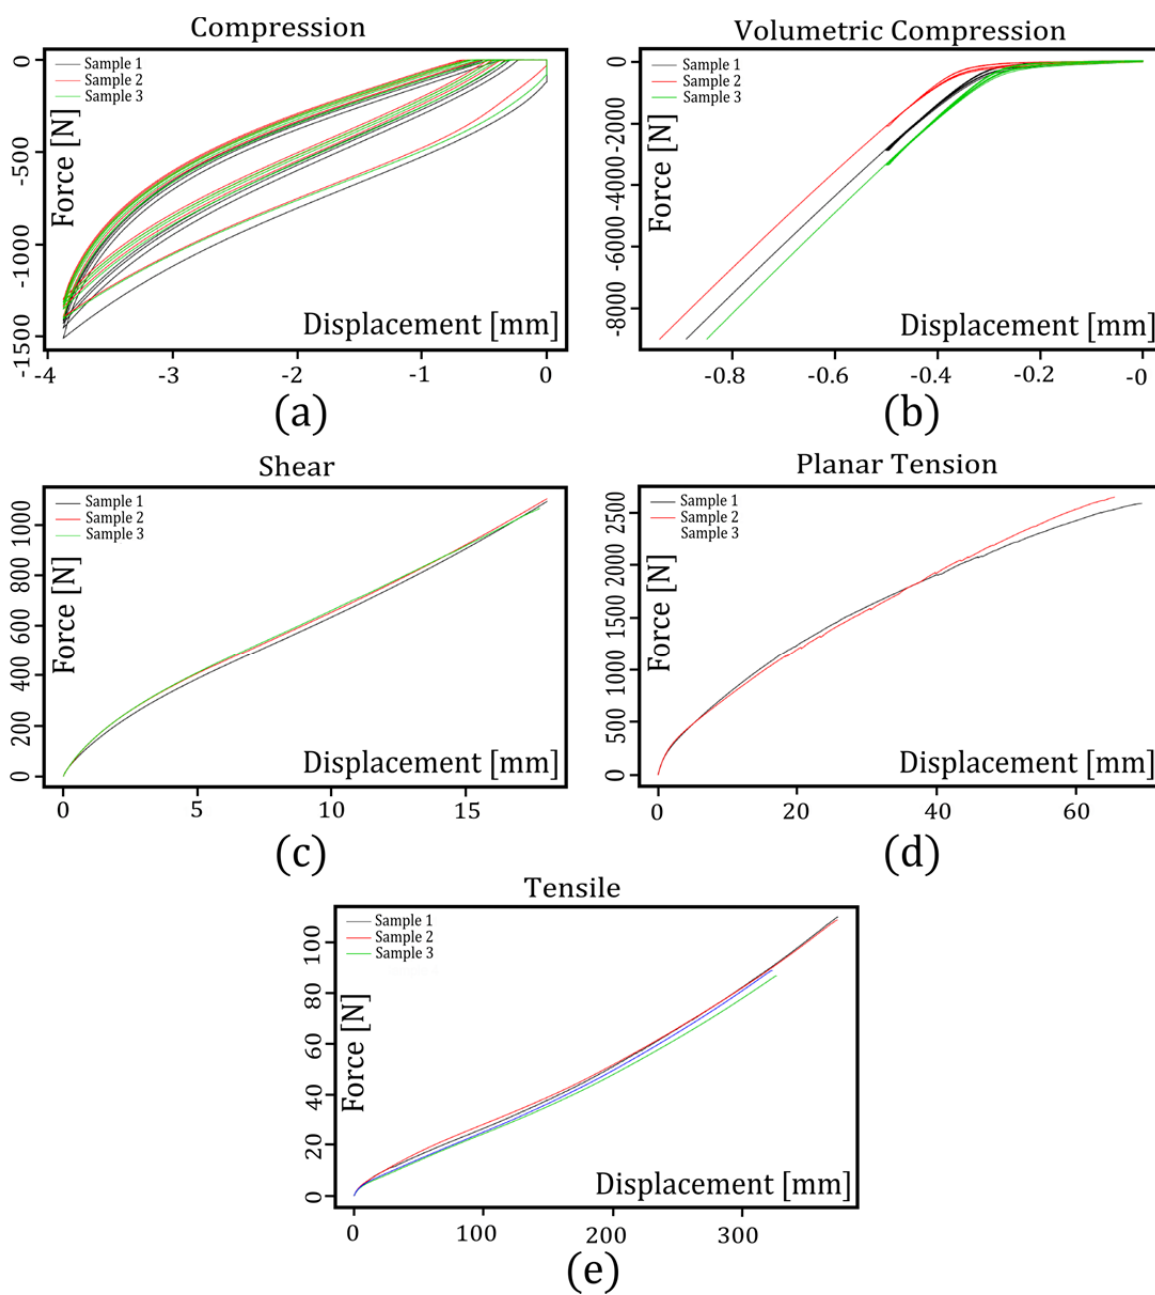

75

76

77 **Figure S10.** (a) Compression test for the NBR material; (b) Volumetric Compression test for the NBR

78 material; (c) Shear test for the NBR material; (d) Planar Tension test for the NBR material, and (e)

79 Tensile test for the NBR material.

80



81 S3.2. PUR Material

82

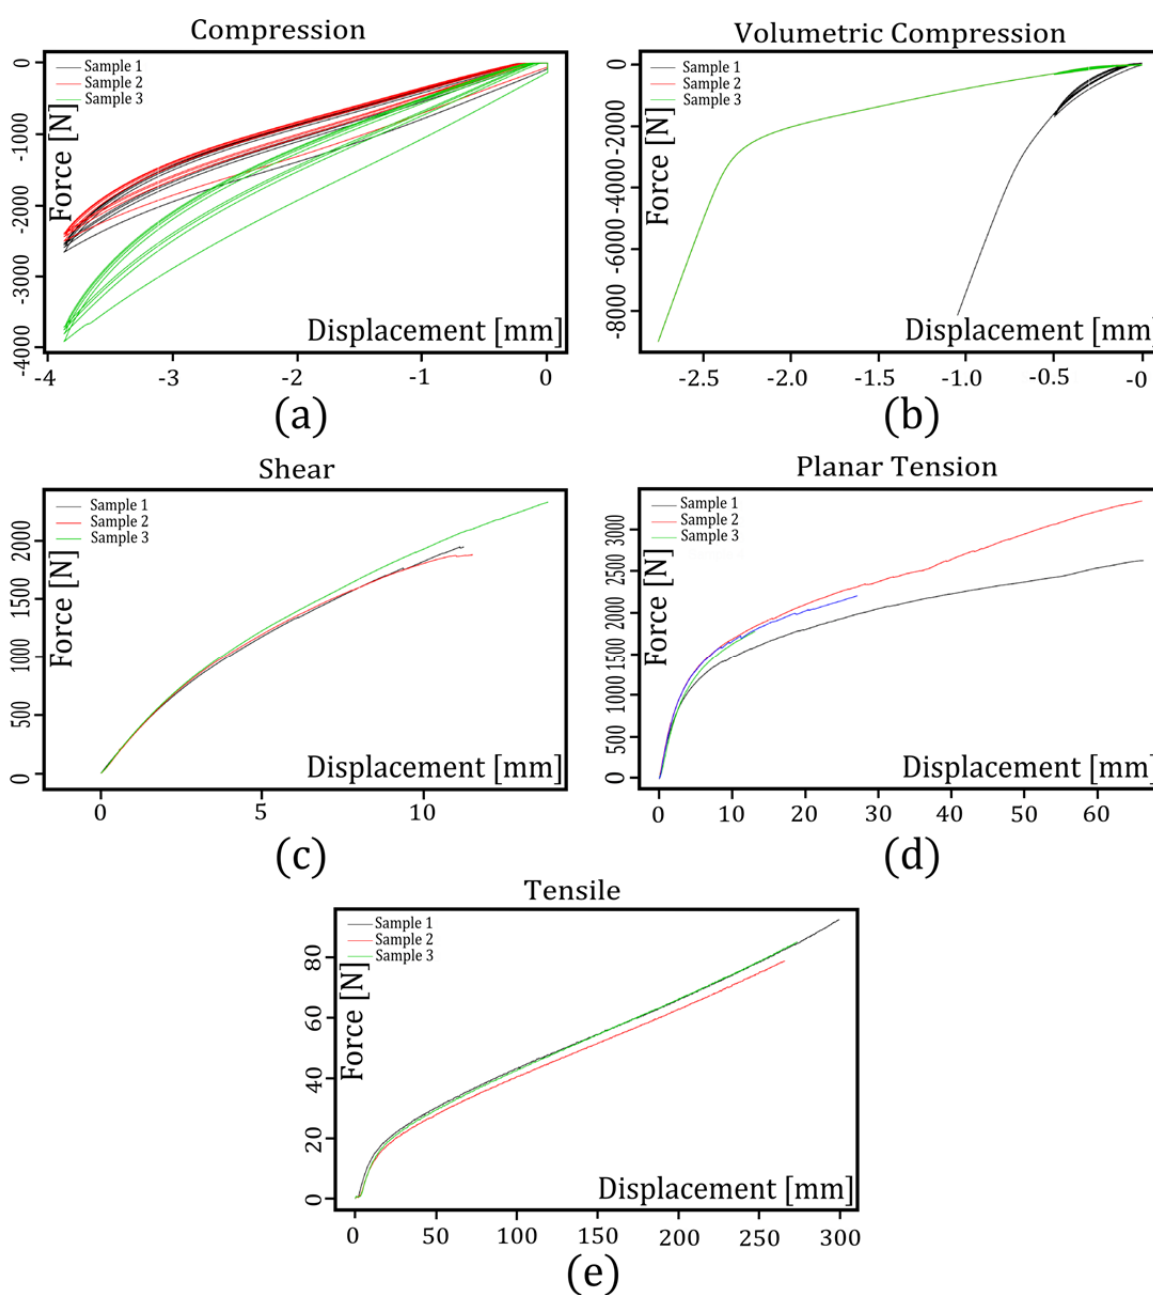

83

84

**Figure S11.** (a) Compression test for the PUR material; (b) Volumetric Compression test for the PUR material; (c) Shear test for the PUR material; (d) Planar Tension test for the PUR material, and (e) Tensile test for the PUR material.

85

86

87

88

89 S3.3. EVA Material  
 90

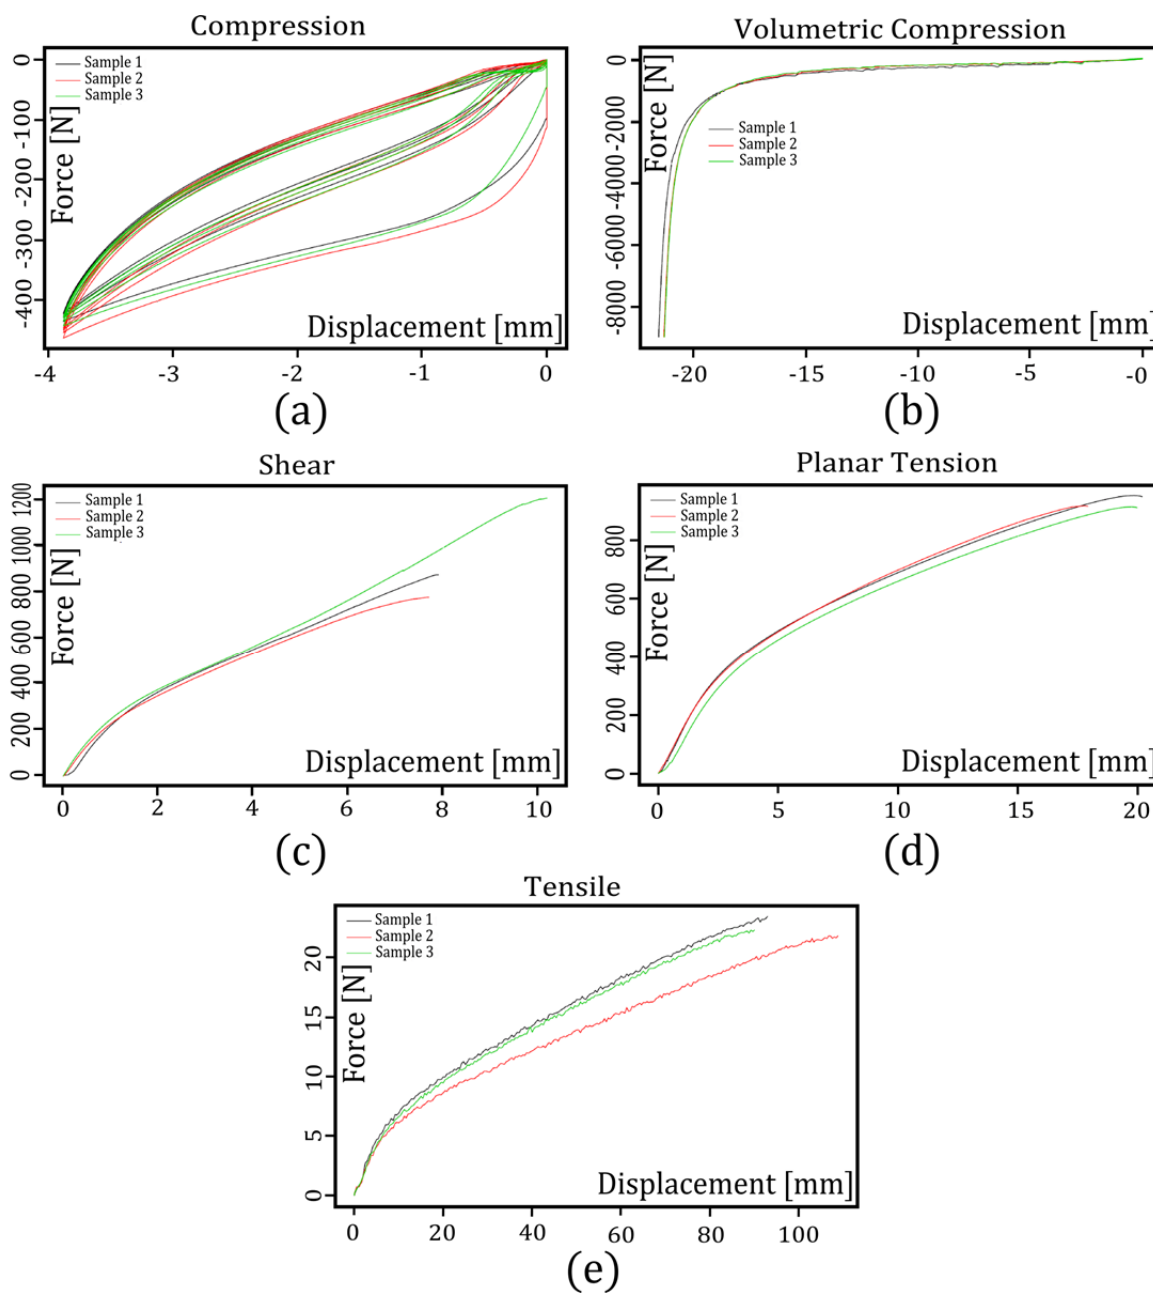

91  
 92  
 93  
 94  
 95

**Figure S12.** (a) Compression test for the EVA material; (b) Volumetric Compression test for the EVA material; (c) Shear test for the EVA material; (d) Planar Tension test for the EVA material, and (e) Tensile test for the EVA material.

96 S3.4.SBR Material

97

98

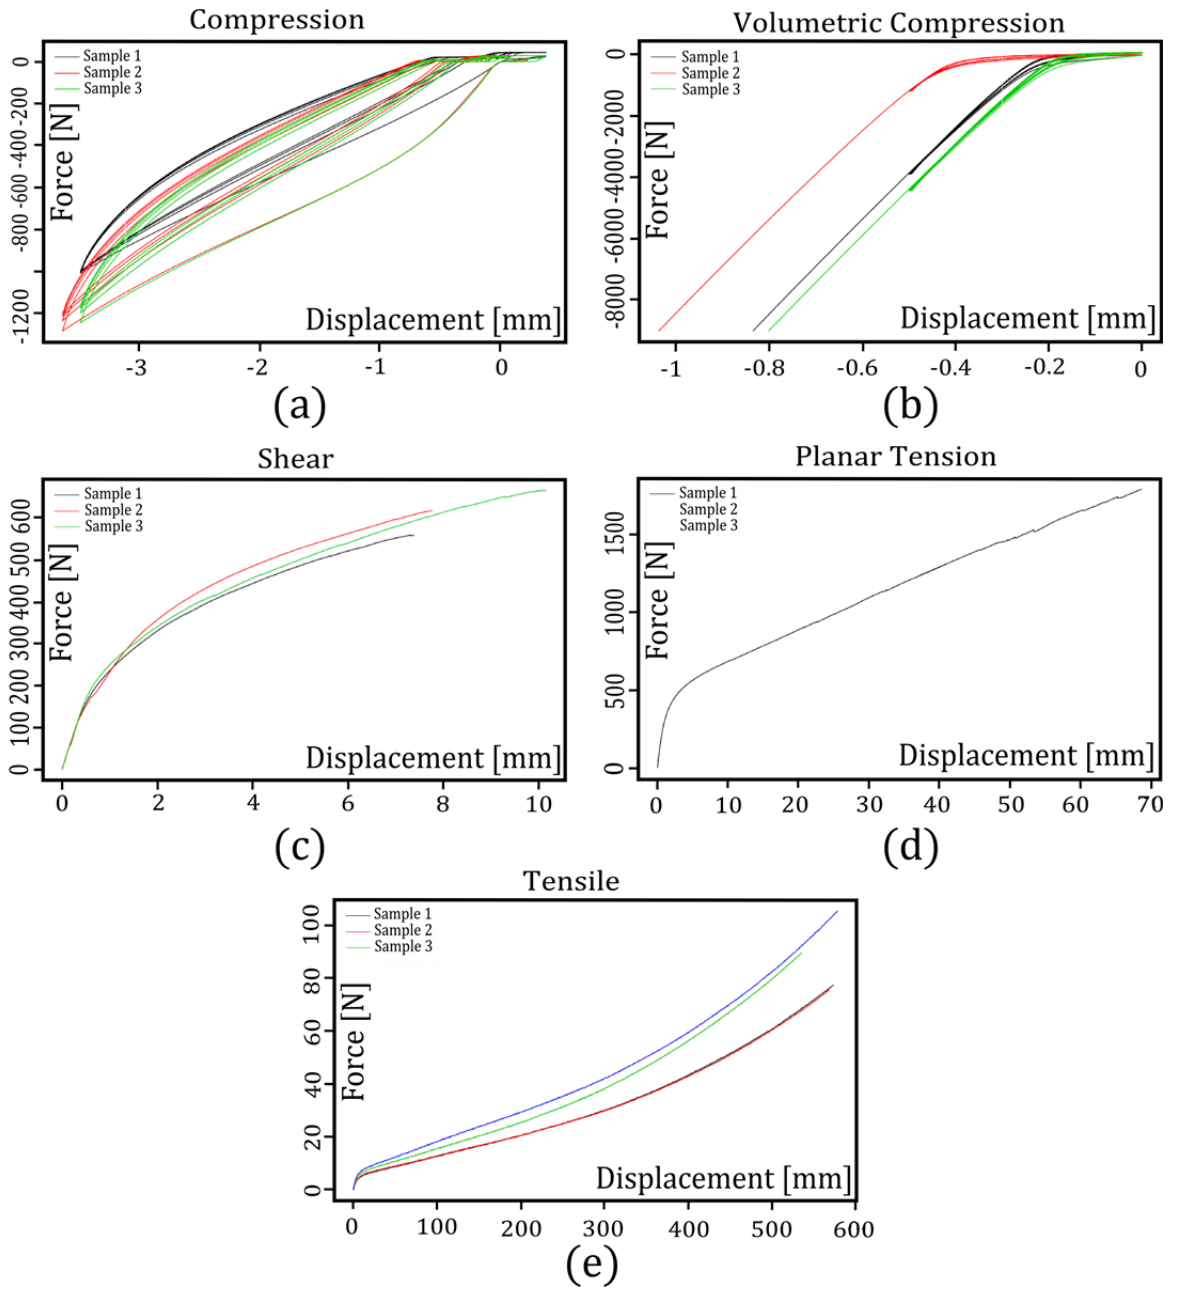

99

100 **Figure S13.** (a) Compression test for the SBR material; (b) Volumetric Compression test for the SBR  
 101 material; (c) Shear test for the SBR material; (d) Planar Tension test for the SBR material, and (e)  
 102 Tensile test for the SBR material.

103

104

105 **S4. Design matrix and experiments**106 *S4.1. NBR Material*107 **Table S1.** Design matrix and experiments obtained with a 5k DoE for the hyper-elastic  
108 Mooney-Rivlin model of the NBR material used in the Shear test.

| <i>Sample</i> | <i>Inputs</i>     |                   |                   | <i>Output</i>               |                     |
|---------------|-------------------|-------------------|-------------------|-----------------------------|---------------------|
|               | <i>C10</i><br>(x) | <i>C01</i><br>(x) | <i>C11</i><br>(x) | <i>Displacement</i><br>(mm) | <i>Force</i><br>(N) |
| 1             | -0.25             | 0.35              | 0.125             | 0.00                        | 0.000               |
| 2             | -0.25             | 0.35              | 0.125             | 0.50                        | 12.117              |
| 3             | -0.25             | 0.35              | 0.125             | 1.00                        | 24.695              |
| 4             | -0.25             | 0.35              | 0.125             | 1.50                        | 38.228              |
| 5             | -0.25             | 0.35              | 0.125             | 2.00                        | 53.264              |
| 6             | -0.25             | 0.35              | 0.125             | 2.50                        | 70.419              |
| 7             | -0.25             | 0.35              | 0.125             | 3.00                        | 90.374              |
| 8             | -0.25             | 0.35              | 0.125             | 3.50                        | 113.829             |
| 9             | -0.25             | 0.35              | 0.125             | 4.00                        | 141.470             |
| 10            | -0.25             | 0.35              | 0.125             | 4.50                        | 173.949             |
| 11            | -0.25             | 0.35              | 0.125             | 5.00                        | 211.880             |
| ...           | ...               | ...               | ...               | ...                         | ...                 |
| 2623          | 1.25              | 1.00              | 0.500             | 9.00                        | 7288.559            |
| 2624          | 1.25              | 1.00              | 0.500             | 9.50                        | 7975.014            |
| 2625          | 1.25              | 1.00              | 0.500             | 10.00                       | 8703.273            |

109 **Table S2.** Design matrix and experiments obtained with a 5k DoE for the hyper-elastic  
110 Mooney-Rivlin model of the NBR material used in the Volumetric Compression test.

| <i>Sample</i> | <i>Inputs</i>     |                   |                   | <i>Output</i>               |                     |
|---------------|-------------------|-------------------|-------------------|-----------------------------|---------------------|
|               | <i>C10</i><br>(x) | <i>C01</i><br>(x) | <i>C11</i><br>(x) | <i>Displacement</i><br>(mm) | <i>Force</i><br>(N) |
| 1             | -0.25             | 0.35              | 0.125             | 0.00                        | 0.000               |
| 2             | -0.25             | 0.35              | 0.125             | -0.03                       | -325.281            |
| 3             | -0.25             | 0.35              | 0.125             | -0.06                       | -651.241            |
| 4             | -0.25             | 0.35              | 0.125             | -0.09                       | -977.877            |
| 5             | -0.25             | 0.35              | 0.125             | -0.12                       | -1305.190           |
| 6             | -0.25             | 0.35              | 0.125             | -0.15                       | -1633.190           |
| 7             | -0.25             | 0.35              | 0.125             | -0.18                       | -1961.870           |
| 8             | -0.25             | 0.35              | 0.125             | -0.21                       | -2291.230           |
| 9             | -0.25             | 0.35              | 0.125             | -0.24                       | -2621.280           |
| 10            | -0.25             | 0.35              | 0.125             | -0.27                       | -2952.030           |
| 11            | -0.25             | 0.35              | 0.125             | -0.30                       | -3283.460           |
| ...           | ...               | ...               | ...               | ...                         | ...                 |
| 2623          | 1.25              | 1.00              | 0.500             | -0.54                       | -134101.000         |
| 2624          | 1.25              | 1.00              | 0.500             | -0.57                       | -141699.000         |
| 2625          | 1.25              | 1.00              | 0.500             | -0.60                       | -149314.000         |

111  
112**Table S3.** Design matrix and experiments obtained with a 5k DoE for the hyper-elastic Mooney-Rivlin model of the NBR material used in the Compression test.

| <i>Sample</i> | <i>Inputs</i>     |                   |                   | <i>Output</i>               |                     |
|---------------|-------------------|-------------------|-------------------|-----------------------------|---------------------|
|               | <i>C10</i><br>(x) | <i>C01</i><br>(x) | <i>C11</i><br>(x) | <i>Displacement</i><br>(mm) | <i>Force</i><br>(N) |
| 1             | -0.25             | 0.35              | 0.125             | 0.000                       | 0.000               |
| 2             | -0.25             | 0.35              | 0.125             | -0.195                      | -12.333             |
| 3             | -0.25             | 0.35              | 0.125             | -0.390                      | -27.024             |
| 4             | -0.25             | 0.35              | 0.125             | -0.585                      | -44.620             |
| 5             | -0.25             | 0.35              | 0.125             | -0.780                      | -65.800             |
| 6             | -0.25             | 0.35              | 0.125             | -0.975                      | -91.351             |
| 7             | -0.25             | 0.35              | 0.125             | -1.170                      | -122.190            |
| 8             | -0.25             | 0.35              | 0.125             | -1.365                      | -159.394            |
| 9             | -0.25             | 0.35              | 0.125             | -1.560                      | -204.234            |
| 10            | -0.25             | 0.35              | 0.125             | -1.755                      | -258.219            |
| 11            | -0.25             | 0.35              | 0.125             | -1.950                      | -323.140            |
| ...           | ...               | ...               | ...               | ...                         | ...                 |
| 2623          | 1.25              | 1.00              | 0.500             | -3.510                      | -11696.200          |
| 2624          | 1.25              | 1.00              | 0.500             | -3.705                      | -13446.200          |
| 2625          | 1.25              | 1.00              | 0.500             | -3.900                      | -15478.300          |

113

114  
115**Table S4.** Design matrix and experiments obtained with a 5k DoE for the hyper-elastic Mooney-Rivlin model of the NBR material used in the Tensile test.

| <i>Sample</i> | <i>Inputs</i>     |                   |                   | <i>Output</i>               |                     |
|---------------|-------------------|-------------------|-------------------|-----------------------------|---------------------|
|               | <i>C10</i><br>(x) | <i>C01</i><br>(x) | <i>C11</i><br>(x) | <i>Displacement</i><br>(mm) | <i>Force</i><br>(N) |
| 1             | -0.25             | 0.35              | 0.125             | 0                           | 0.000               |
| 2             | -0.25             | 0.35              | 0.125             | 20                          | 1.317               |
| 3             | -0.25             | 0.35              | 0.125             | 40                          | 3.873               |
| 4             | -0.25             | 0.35              | 0.125             | 60                          | 8.745               |
| 5             | -0.25             | 0.35              | 0.125             | 80                          | 15.937              |
| 6             | -0.25             | 0.35              | 0.125             | 100                         | 25.338              |
| 7             | -0.25             | 0.35              | 0.125             | 120                         | 36.852              |
| 8             | -0.25             | 0.35              | 0.125             | 140                         | 50.402              |
| 9             | -0.25             | 0.35              | 0.125             | 160                         | 65.915              |
| 10            | -0.25             | 0.35              | 0.125             | 180                         | 83.320              |
| 11            | -0.25             | 0.35              | 0.125             | 200                         | 102.542             |
| ...           | ...               | ...               | ...               | ...                         | ...                 |
| 2623          | 1.25              | 1.00              | 0.500             | 360                         | 1693.519            |
| 2624          | 1.25              | 1.00              | 0.500             | 380                         | 1856.357            |
| 2625          | 1.25              | 1.00              | 0.500             | 400                         | 2025.644            |

116  
117**Table S5.** Design matrix and experiments obtained with a 5k DoE for the hyper-elastic Mooney-Rivlin model of the NBR material used in the Planar Tension test.

| <i>Sample</i> | <i>Inputs</i>     |                   |                   | <i>Output</i>               |                     |
|---------------|-------------------|-------------------|-------------------|-----------------------------|---------------------|
|               | <i>C10</i><br>(x) | <i>C01</i><br>(x) | <i>C11</i><br>(x) | <i>Displacement</i><br>(mm) | <i>Force</i><br>(N) |
| 1             | -0.25             | 0.35              | 0.125             | 0.00                        | 0.000               |
| 2             | -0.25             | 0.35              | 0.125             | 2.50                        | 38.682              |
| 3             | -0.25             | 0.35              | 0.125             | 5.00                        | 76.905              |
| 4             | -0.25             | 0.35              | 0.125             | 7.50                        | 127.032             |
| 5             | -0.25             | 0.35              | 0.125             | 10.00                       | 196.563             |
| 6             | -0.25             | 0.35              | 0.125             | 12.50                       | 287.190             |
| 7             | -0.25             | 0.35              | 0.125             | 15.00                       | 399.426             |
| 8             | -0.25             | 0.35              | 0.125             | 17.50                       | 533.686             |
| 9             | -0.25             | 0.35              | 0.125             | 20.00                       | 690.317             |
| 10            | -0.25             | 0.35              | 0.125             | 22.50                       | 868.825             |
| 11            | -0.25             | 0.35              | 0.125             | 25.00                       | 1067.408            |
| ...           | ...               | ...               | ...               | ...                         | ...                 |
| 2623          | 1.25              | 1.00              | 0.500             | 45.00                       | 21331.368           |
| 2624          | 1.25              | 1.00              | 0.500             | 47.50                       | 23336.122           |
| 2625          | 1.25              | 1.00              | 0.500             | 50.00                       | 25362.509           |

118  
119



## 120 S4.2. PUR Material

121 **Table S6.** Design matrix and experiments obtained with a 5k DoE the hyper-elastic Ogden model of  
122 the PUR material used in the Shear test.

| <i>Sample</i> | <i>Inputs</i>    |                  |                             | <i>Output</i>       |
|---------------|------------------|------------------|-----------------------------|---------------------|
|               | <i>K1</i><br>(x) | <i>K2</i><br>(x) | <i>Displacement</i><br>(mm) | <i>Force</i><br>(N) |
| 1             | 0.0              | -0.50            | 0.00                        | 0.000               |
| 2             | 0.0              | -0.50            | 0.50                        | 30.074              |
| 3             | 0.0              | -0.50            | 1.00                        | 60.111              |
| 4             | 0.0              | -0.50            | 1.50                        | 90.074              |
| 5             | 0.0              | -0.50            | 2.00                        | 119.923             |
| 6             | 0.0              | -0.50            | 2.50                        | 149.614             |
| 7             | 0.0              | -0.50            | 3.00                        | 179.101             |
| 8             | 0.0              | -0.50            | 3.50                        | 208.333             |
| 9             | 0.0              | -0.50            | 4.00                        | 237.252             |
| 10            | 0.0              | -0.50            | 4.50                        | 265.799             |
| 11            | 0.0              | -0.50            | 5.00                        | 293.908             |
| ...           | ...              | ...              | ...                         | ...                 |
| 523           | 0.5              | 0.0625           | 9.00                        | 946.066             |
| 524           | 0.5              | 0.0625           | 9.50                        | 1020.619            |
| 525           | 0.5              | 0.0625           | 10.00                       | 1098.280            |

123 **Table S7.** Design matrix and experiments obtained with a 5k DoE the hyper-elastic Ogden model of  
124 the PUR material used in the Volumetric Compression test.

| <i>Sample</i> | <i>Inputs</i>    |                  |                             | <i>Output</i>       |
|---------------|------------------|------------------|-----------------------------|---------------------|
|               | <i>K1</i><br>(x) | <i>K2</i><br>(x) | <i>Displacement</i><br>(mm) | <i>Force</i><br>(N) |
| 1             | 0.0              | -0.50            | 0.00                        | 0.000               |
| 2             | 0.0              | -0.50            | -0.03                       | -813.201            |
| 3             | 0.0              | -0.50            | -0.06                       | -1628.100           |
| 4             | 0.0              | -0.50            | -0.09                       | -2444.690           |
| 5             | 0.0              | -0.50            | -0.12                       | -3262.976           |
| 6             | 0.0              | -0.50            | -0.15                       | -4082.964           |
| 7             | 0.0              | -0.50            | -0.18                       | -4904.660           |
| 8             | 0.0              | -0.50            | -0.21                       | -5728.064           |
| 9             | 0.0              | -0.50            | -0.24                       | -6553.186           |
| 10            | 0.0              | -0.50            | -0.27                       | -7380.034           |
| 11            | 0.0              | -0.50            | -0.30                       | -8208.603           |
| ...           | ...              | ...              | ...                         | ...                 |
| 523           | 0.5              | 0.25             | -0.54                       | -29795.848          |
| 524           | 0.5              | 0.25             | -0.57                       | -31484.312          |
| 525           | 0.5              | 0.25             | -0.60                       | -33176.336          |

125  
126**Table S8.** Design matrix and experiments obtained with a 5k DoE the hyper-elastic Ogden model of the PUR material used in the Compression test.

| <i>Sample</i> | <i>Inputs</i>    |                  | <i>Output</i>               |                     |
|---------------|------------------|------------------|-----------------------------|---------------------|
|               | <i>K1</i><br>(x) | <i>K2</i><br>(x) | <i>Displacement</i><br>(mm) | <i>Force</i><br>(N) |
| 1             | 0.0              | -0.50            | 0.000                       | 0.000               |
| 2             | 0.0              | -0.50            | -0.195                      | -29.510             |
| 3             | 0.0              | -0.50            | -0.390                      | -61.337             |
| 4             | 0.0              | -0.50            | -0.585                      | -95.602             |
| 5             | 0.0              | -0.50            | -0.780                      | -132.479            |
| 6             | 0.0              | -0.50            | -0.975                      | -172.164            |
| 7             | 0.0              | -0.50            | -1.170                      | -214.874            |
| 8             | 0.0              | -0.50            | -1.365                      | -260.856            |
| 9             | 0.0              | -0.50            | -1.560                      | -310.397            |
| 10            | 0.0              | -0.50            | -1.755                      | -363.829            |
| 11            | 0.0              | -0.50            | -1.950                      | -421.540            |
| ...           | ...              | ...              | ...                         | ...                 |
| 523           | 0.5              | 0.25             | -3.510                      | -652.503            |
| 524           | 0.5              | 0.25             | -3.705                      | -710.302            |
| 525           | 0.5              | 0.25             | -3.900                      | -772.318            |

127  
128**Table S9.** Design matrix and experiments obtained with a 5k DoE the hyper-elastic Ogden model of the PUR material used in the Tensile test.

| <i>Sample</i> | <i>Inputs</i>    |                  | <i>Output</i>               |                     |
|---------------|------------------|------------------|-----------------------------|---------------------|
|               | <i>K1</i><br>(x) | <i>K2</i><br>(x) | <i>Displacement</i><br>(mm) | <i>Force</i><br>(N) |
| 1             | 0.0              | -0.50            | 0                           | 0.000               |
| 2             | 0.0              | -0.50            | 20                          | 2.987               |
| 3             | 0.0              | -0.50            | 40                          | 3.651               |
| 4             | 0.0              | -0.50            | 60                          | 3.850               |
| 5             | 0.0              | -0.50            | 80                          | 3.924               |
| 6             | 0.0              | -0.50            | 100                         | 3.957               |
| 7             | 0.0              | -0.50            | 120                         | 3.974               |
| 8             | 0.0              | -0.50            | 140                         | 3.983               |
| 9             | 0.0              | -0.50            | 160                         | 3.988               |
| 10            | 0.0              | -0.50            | 180                         | 3.991               |
| 11            | 0.0              | -0.50            | 200                         | 3.993               |
| ...           | ...              | ...              | ...                         | ...                 |
| 523           | 0.5              | -0.125           | 360                         | 291.280             |
| 524           | 0.5              | -0.125           | 380                         | 318.681             |
| 525           | 0.5              | -0.125           | 400                         | 347.177             |

129

130  
131**Table S10.** Design matrix and experiments obtained with a 5k DoE the hyper-elastic Ogden model of the PUR material used in the Planar Tension test.

| <i>Sample</i> | <i>Inputs</i>    |                  | <i>Output</i>               |                     |
|---------------|------------------|------------------|-----------------------------|---------------------|
|               | <i>K1</i><br>(x) | <i>K2</i><br>(x) | <i>Displacement</i><br>(mm) | <i>Force</i><br>(N) |
| 1             | 0.0              | -0.50            | 0.00                        | 0                   |
| 2             | 0.0              | -0.50            | 2.50                        | 94.471              |
| 3             | 0.0              | -0.50            | 5.00                        | 167.033             |
| 4             | 0.0              | -0.50            | 7.50                        | 224.882             |
| 5             | 0.0              | -0.50            | 10.00                       | 272.226             |
| 6             | 0.0              | -0.50            | 12.50                       | 311.708             |
| 7             | 0.0              | -0.50            | 15.00                       | 345.031             |
| 8             | 0.0              | -0.50            | 17.50                       | 373.317             |
| 9             | 0.0              | -0.50            | 20.00                       | 397.313             |
| 10            | 0.0              | -0.50            | 22.50                       | 414.668             |
| 11            | 0.0              | -0.50            | 25.00                       | 426.365             |
| ...           | ...              | ...              | ...                         | ...                 |
| 523           | 0.5              | 0.0625           | 45.00                       | 2081.657            |
| 524           | 0.5              | 0.0625           | 47.50                       | 2235.548            |
| 525           | 0.5              | 0.0625           | 50.00                       | 2394.748            |

132

133

## 134 S4.3. SBR Material

135 **Table S11.** Design matrix and experiments obtained with a 5k DoE for the hyper-elastic Gent model  
136 of the SBR material used in the Shear test.

| <i>Sample</i> | <i>Inputs</i>   |                   |                             | <i>Output</i>       |
|---------------|-----------------|-------------------|-----------------------------|---------------------|
|               | <i>E</i><br>(x) | <i>Inv</i><br>(x) | <i>Displacement</i><br>(mm) | <i>Force</i><br>(N) |
| 1             | 0.6             | 63.0              | 0.00                        | 0.000               |
| 2             | 0.6             | 63.0              | 0.50                        | 12.051              |
| 3             | 0.6             | 63.0              | 1.00                        | 24.112              |
| 4             | 0.6             | 63.0              | 1.50                        | 36.194              |
| 5             | 0.6             | 63.0              | 2.00                        | 48.307              |
| 6             | 0.6             | 63.0              | 2.50                        | 60.461              |
| 7             | 0.6             | 63.0              | 3.00                        | 72.665              |
| 8             | 0.6             | 63.0              | 3.50                        | 84.925              |
| 9             | 0.6             | 63.0              | 4.00                        | 97.250              |
| 10            | 0.6             | 63.0              | 4.50                        | 109.645             |
| 11            | 0.6             | 63.0              | 5.00                        | 122.117             |
| ...           | ...             | ...               | ...                         | ...                 |
| 523           | 3.7             | 79.5              | 9.00                        | 1375.126            |
| 524           | 3.7             | 79.5              | 9.50                        | 1455.766            |
| 525           | 3.7             | 79.5              | 10.00                       | 1536.961            |

137 **Table S12.** Design matrix and experiments obtained with a 5k DoE for the hyper-elastic Gent model  
138 of the SBR material used in the Volumetric Compression test.

| <i>Sample</i> | <i>Inputs</i>   |                   |                             | <i>Output</i>       |
|---------------|-----------------|-------------------|-----------------------------|---------------------|
|               | <i>E</i><br>(x) | <i>Inv</i><br>(x) | <i>Displacement</i><br>(mm) | <i>Force</i><br>(N) |
| 1             | 0.6             | 63.0              | 0.00                        | 0.000               |
| 2             | 0.6             | 63.0              | -0.03                       | -325.280            |
| 3             | 0.6             | 63.0              | -0.06                       | -651.240            |
| 4             | 0.6             | 63.0              | -0.09                       | -977.875            |
| 5             | 0.6             | 63.0              | -0.12                       | -1305.190           |
| 6             | 0.6             | 63.0              | -0.15                       | -1633.184           |
| 7             | 0.6             | 63.0              | -0.18                       | -1961.862           |
| 8             | 0.6             | 63.0              | -0.21                       | -2291.223           |
| 9             | 0.6             | 63.0              | -0.24                       | -2621.271           |
| 10            | 0.6             | 63.0              | -0.27                       | -2952.011           |
| 11            | 0.6             | 63.0              | -0.30                       | -3283.435           |
| ...           | ...             | ...               | ...                         | ...                 |
| 523           | 3.7             | 79.5              | -0.54                       | -36753.288          |
| 524           | 3.7             | 79.5              | -0.57                       | -38835.905          |
| 525           | 3.7             | 79.5              | -0.60                       | -40923.022          |

139  
140**Table S13.** Design matrix and experiments obtained with a 5k DoE for the hyper-elastic Gent model of the SBR material used in the Compression test.

| <i>Sample</i> | <i>Inputs</i>   |                   |                             | <i>Output</i>       |
|---------------|-----------------|-------------------|-----------------------------|---------------------|
|               | <i>E</i><br>(x) | <i>Inv</i><br>(x) | <i>Displacement</i><br>(mm) | <i>Force</i><br>(N) |
| 1             | 0.6             | 63.0              | 0.000                       | 0.000               |
| 2             | 0.6             | 63.0              | -0.195                      | -11.611             |
| 3             | 0.6             | 63.0              | -0.390                      | -23.709             |
| 4             | 0.6             | 63.0              | -0.585                      | -36.304             |
| 5             | 0.6             | 63.0              | -0.780                      | -49.419             |
| 6             | 0.6             | 63.0              | -0.975                      | -63.075             |
| 7             | 0.6             | 63.0              | -1.170                      | -77.300             |
| 8             | 0.6             | 63.0              | -1.365                      | -92.124             |
| 9             | 0.6             | 63.0              | -1.560                      | -107.587            |
| 10            | 0.6             | 63.0              | -1.755                      | -123.738            |
| 11            | 0.6             | 63.0              | -1.950                      | -140.637            |
| ...           | ...             | ...               | ...                         | ...                 |
| 523           | 3.7             | 79.5              | -3.510                      | -1943.177           |
| 524           | 3.7             | 79.5              | -3.705                      | -2122.925           |
| 525           | 3.7             | 79.5              | -3.900                      | -2323.115           |

141

142  
143**Table S14.** Design matrix and experiments obtained with a 5k DoE for the hyper-elastic Gent model of the SBR material used in the Tensile test.

| <i>Sample</i> | <i>Inputs</i>   |                   |                             | <i>Output</i>       |
|---------------|-----------------|-------------------|-----------------------------|---------------------|
|               | <i>E</i><br>(x) | <i>Inv</i><br>(x) | <i>Displacement</i><br>(mm) | <i>Force</i><br>(N) |
| 1             | 0.6             | 63.0              | 0                           | 0.000               |
| 2             | 0.6             | 63.0              | 20                          | 1.729               |
| 3             | 0.6             | 63.0              | 40                          | 2.965               |
| 4             | 0.6             | 63.0              | 60                          | 4.112               |
| 5             | 0.6             | 63.0              | 80                          | 5.282               |
| 6             | 0.6             | 63.0              | 100                         | 6.530               |
| 7             | 0.6             | 63.0              | 120                         | 7.891               |
| 8             | 0.6             | 63.0              | 140                         | 9.401               |
| 9             | 0.6             | 63.0              | 160                         | 11.100              |
| 10            | 0.6             | 63.0              | 180                         | 13.036              |
| 11            | 0.6             | 63.0              | 200                         | 15.274              |
| ...           | ...             | ...               | ...                         | ...                 |
| 523           | 3.7             | 79.5              | 360                         | 288.649             |
| 524           | 3.7             | 79.5              | 380                         | 354.913             |
| 525           | 3.7             | 79.5              | 400                         | 510.715             |

144  
145**Table S15.** Design matrix and experiments obtained with a 5k DoE for the hyper-elastic Gent model of the SBR material used in the Planar Tension test.

| <i>Sample</i> | <i>Inputs</i>   |                   | <i>Output</i>               |                     |
|---------------|-----------------|-------------------|-----------------------------|---------------------|
|               | <i>E</i><br>(x) | <i>Inv</i><br>(x) | <i>Displacement</i><br>(mm) | <i>Force</i><br>(N) |
| 1             | 0.6             | 63.0              | 0.00                        | 0.000               |
| 2             | 0.6             | 63.0              | 2.50                        | 38.367              |
| 3             | 0.6             | 63.0              | 5.00                        | 68.960              |
| 4             | 0.6             | 63.0              | 7.50                        | 94.539              |
| 5             | 0.6             | 63.0              | 10.00                       | 116.749             |
| 6             | 0.6             | 63.0              | 12.50                       | 136.654             |
| 7             | 0.6             | 63.0              | 15.00                       | 154.962             |
| 8             | 0.6             | 63.0              | 17.50                       | 172.163             |
| 9             | 0.6             | 63.0              | 20.00                       | 188.600             |
| 10            | 0.6             | 63.0              | 22.50                       | 204.523             |
| 11            | 0.6             | 63.0              | 25.00                       | 220.119             |
| ...           | ...             | ...               | ...                         | ...                 |
| 523           | 3.7             | 79.5              | 45.00                       | 2083.990            |
| 524           | 3.7             | 79.5              | 47.50                       | 2179.894            |
| 525           | 3.7             | 79.5              | 50.00                       | 2277.445            |

146  
147



## 148 S4.4. EVA Material

149 **Table S16.** Design matrix and experiments obtained with a 3k DoE for the hyper-elastic  
150 Arruda-Boyce model of the EVA material used in the Shear test.

| <i>Sample</i> | <i>Inputs</i>     |                     |                             | <i>Output</i>       |
|---------------|-------------------|---------------------|-----------------------------|---------------------|
|               | <i>Nkt</i><br>(x) | <i>Chain</i><br>(x) | <i>Displacement</i><br>(mm) | <i>Force</i><br>(N) |
| 1             | 0.26              | 2.0                 | 0.00                        | 0.000               |
| 2             | 0.26              | 2.0                 | 0.50                        | 24.332              |
| 3             | 0.26              | 2.0                 | 1.00                        | 48.792              |
| 4             | 0.26              | 2.0                 | 1.50                        | 73.511              |
| 5             | 0.26              | 2.0                 | 2.00                        | 98.624              |
| 6             | 0.26              | 2.0                 | 2.50                        | 124.269             |
| 7             | 0.26              | 2.0                 | 3.00                        | 150.593             |
| 8             | 0.26              | 2.0                 | 3.50                        | 177.753             |
| 9             | 0.26              | 2.0                 | 4.00                        | 205.918             |
| 10            | 0.26              | 2.0                 | 4.50                        | 235.267             |
| ...           | ...               | ...                 | ...                         | ...                 |
| 187           | 0.90              | 25.0                | 9.00                        | 1023.925            |
| 188           | 0.90              | 25.0                | 9.50                        | 1083.246            |
| 189           | 0.90              | 25.0                | 10.00                       | 1142.861            |

151 **Table S17.** Design matrix and experiments obtained with a 3k DoE for the hyper-elastic  
152 Arruda-Boyce model of the EVA material used in the Volumetric Compression test.

| <i>Sample</i> | <i>Inputs</i>     |                     |                             | <i>Output</i>       |
|---------------|-------------------|---------------------|-----------------------------|---------------------|
|               | <i>Nkt</i><br>(x) | <i>Chain</i><br>(x) | <i>Displacement</i><br>(mm) | <i>Force</i><br>(N) |
| 1             | 0.26              | 2.0                 | 0.00                        | 0.000               |
| 2             | 0.26              | 2.0                 | -0.03                       | -422.927            |
| 3             | 0.26              | 2.0                 | -0.06                       | -846.737            |
| 4             | 0.26              | 2.0                 | -0.09                       | -1271.426           |
| 5             | 0.26              | 2.0                 | -0.12                       | -1696.997           |
| 6             | 0.26              | 2.0                 | -0.15                       | -2123.453           |
| 7             | 0.26              | 2.0                 | -0.18                       | -2550.796           |
| 8             | 0.26              | 2.0                 | -0.21                       | -2979.030           |
| 9             | 0.26              | 2.0                 | -0.24                       | -3408.156           |
| 10            | 0.26              | 2.0                 | -0.27                       | -3838.179           |
| 11            | 0.26              | 2.0                 | -0.30                       | -4269.097           |
| ...           | ...               | ...                 | ...                         | ...                 |
| 187           | 0.90              | 25.0                | -0.54                       | -26820.067          |
| 188           | 0.90              | 25.0                | -0.57                       | -28340.198          |
| 189           | 0.90              | 25.0                | -0.60                       | -29862.945          |

153  
154**Table S18.** Design matrix and experiments obtained with a 3k DoE for the hyper-elastic Arruda-Boyce model of the EVA material used in the Compression test.

| <i>Sample</i> | <i>Inputs</i>     |                     |                             | <i>Output</i>       |
|---------------|-------------------|---------------------|-----------------------------|---------------------|
|               | <i>Nkt</i><br>(x) | <i>Chain</i><br>(x) | <i>Displacement</i><br>(mm) | <i>Force</i><br>(N) |
| 1             | 0.26              | 2.0                 | 0.000                       | 0.000               |
| 2             | 0.26              | 2.0                 | -0.195                      | -23.452             |
| 3             | 0.26              | 2.0                 | -0.390                      | -47.937             |
| 4             | 0.26              | 2.0                 | -0.585                      | -73.535             |
| 5             | 0.26              | 2.0                 | -0.780                      | -100.354            |
| 6             | 0.26              | 2.0                 | -0.975                      | -128.520            |
| 7             | 0.26              | 2.0                 | -1.170                      | -158.181            |
| 8             | 0.26              | 2.0                 | -1.365                      | -189.515            |
| 9             | 0.26              | 2.0                 | -1.560                      | -222.735            |
| 10            | 0.26              | 2.0                 | -1.755                      | -258.107            |
| 11            | 0.26              | 2.0                 | -1.950                      | -295.949            |
| ...           | ...               | ...                 | ...                         | ...                 |
| 187           | 0.90              | 25.0                | -3.510                      | -1448.051           |
| 188           | 0.90              | 25.0                | -3.705                      | -1581.354           |
| 189           | 0.90              | 25.0                | -3.900                      | -1729.455           |

155  
156**Table S19.** Design matrix and experiments obtained with a 3k DoE for the hyper-elastic Arruda-Boyce model of the EVA material used in the Tensile test.

| <i>Sample</i> | <i>Inputs</i>     |                     |                             | <i>Output</i>       |
|---------------|-------------------|---------------------|-----------------------------|---------------------|
|               | <i>Nkt</i><br>(x) | <i>Chain</i><br>(x) | <i>Displacement</i><br>(mm) | <i>Force</i><br>(N) |
| 1             | 0.26              | 2.0                 | 0                           | 0.000               |
| 2             | 0.26              | 2.0                 | 20                          | 3.786               |
| 3             | 0.26              | 2.0                 | 40                          | 8.093               |
| 4             | 0.26              | 2.0                 | 60                          | 14.827              |
| 5             | 0.26              | 2.0                 | 80                          | 26.400              |
| 6             | 0.26              | 2.0                 | 100                         | 48.206              |
| 7             | 0.26              | 2.0                 | 120                         | 90.647              |
| 8             | 0.26              | 2.0                 | 140                         | 171.542             |
| 9             | 0.26              | 2.0                 | 160                         | 317.378             |
| 10            | 0.26              | 2.0                 | 180                         | 559.306             |
| 11            | 0.26              | 2.0                 | 200                         | 920.480             |
| ...           | ...               | ...                 | ...                         | ...                 |
| 187           | 0.90              | 25.0                | 360                         | 158.135             |
| 188           | 0.90              | 25.0                | 380                         | 180.585             |
| 189           | 0.90              | 25.0                | 400                         | 207.152             |

157  
158**Table S20.** Design matrix and experiments obtained with a 3k DoE for the hyper-elastic Arruda-Boyce model of the EVA material used in the Planar Tension test.

| <i>Sample</i> | <i>Inputs</i>     |                     |                             | <i>Output</i>       |
|---------------|-------------------|---------------------|-----------------------------|---------------------|
|               | <i>Nkt</i><br>(x) | <i>Chain</i><br>(x) | <i>Displacement</i><br>(mm) | <i>Force</i><br>(N) |
| 1             | 0.26              | 2.0                 | 0.00                        | 0.000               |
| 2             | 0.26              | 2.0                 | 2.50                        | 77.970              |
| 3             | 0.26              | 2.0                 | 5.00                        | 142.607             |
| 4             | 0.26              | 2.0                 | 7.50                        | 200.861             |
| 5             | 0.26              | 2.0                 | 10.00                       | 257.125             |
| 6             | 0.26              | 2.0                 | 12.50                       | 314.693             |
| 7             | 0.26              | 2.0                 | 15.00                       | 376.396             |
| 8             | 0.26              | 2.0                 | 17.50                       | 444.990             |
| 9             | 0.26              | 2.0                 | 20.00                       | 523.425             |
| 10            | 0.26              | 2.0                 | 22.50                       | 615.058             |
| 11            | 0.26              | 2.0                 | 25.00                       | 723.855             |
| ...           | ...               | ...                 | ...                         | ...                 |
| 187           | 0.90              | 25.0                | 45.00                       | 1517.838            |
| 188           | 0.90              | 25.0                | 47.50                       | 1583.657            |
| 189           | 0.90              | 25.0                | 50.00                       | 1650.160            |

159  
160

161 **S5. Modeling the  $EF$  for the materials studied according to the standardized tests**162 *S5.1 Gent hyper-elastic model for NBR.*

163

$$EF_{shear} = 131.63192 + 573.60191 \cdot E - 727.3464 \cdot E^2 + 274.78272 \cdot E^3 - 31.8021 \cdot E^4 - 0.09809 \cdot E^2 \cdot I_1 + 0.0144 \cdot E^3 \cdot I_1 + 0.00179 \cdot E \cdot I_1^2 - 1e^{-5} \cdot E \cdot I_1^3$$

164

$$EF_{comVol} = 1691.91316 - 4218.6483 \cdot E + 4467.51432 \cdot E^2 - 1221.19525 \cdot E^3 + 120.3148 \cdot E^4 - 4e^{-5} \cdot E \cdot I_1$$

165

166

$$EF_{comp} = 162.59816 + 506.39271 \cdot E - 745.52302 \cdot E^2 + 306.56328 \cdot E^3 - 37.36569 \cdot E^4 - 0.07396 \cdot E^2 \cdot I_1 + 0.01082 \cdot E^3 \cdot I_1 + 0.00135 \cdot E \cdot I_1^2$$

$$EF_{trac} = -0.04142 + 42.93096 \cdot E - 52.92906 \cdot E^2 + 23.18558 \cdot E^3 - 2.98271 \cdot E^4 + 0.3083 \cdot I_1 - 0.21959 \cdot E^2 \cdot I_1 + 0.03988 \cdot E^3 \cdot I_1 - 0.00331 \cdot I_1^2 + 0.00336 \cdot E \cdot I_1^2 - 0.00042 \cdot E^2 \cdot I_1^2$$

167

$$EF_{tens} = 570.06975 - 148.80814 \cdot E + 0.16335 \cdot I_1 + 0.10503 \cdot E \cdot I_1 - 0.00346 \cdot I_1^2 - 0.00101 \cdot E \cdot I_1^2 + 3e^{-5} \cdot I_1^3$$

168

169 *S5.2 Gent hyper-elastic model for EVA.*

170

$$EF_{shear} = 573.42844 - 384.8863 \cdot E + 239.92652 \cdot E^2 - 100.16773 \cdot E^3 + 14.66798 \cdot E^4 + 0.06727 \cdot E \cdot I_1 - 0.0274 \cdot E^2 \cdot I_1 - 0.00018 \cdot I_1^2 + 5e^{-5} \cdot E^2 \cdot I_1^2$$

171

$$EF_{comVol} = 707.60358 - 1888.22615 \cdot E + 2264.06588 \cdot E^2 - 618.88252 \cdot E^3 + 60.97365 \cdot E^4$$

172

$$EF_{comp} = -84.84631 + 197.34822 \cdot E - 0.00027 \cdot E^3 - 0.99611 \cdot I_1 - 0.10962 \cdot E \cdot I_1 - 2e^{-5} \cdot E^2 \cdot I_1 + 0.0211 \cdot I_1^2 + 0.00113 \cdot E \cdot I_1^2 - 2e^{-4} \cdot I_1^3$$

173

$$EF_{trac} = 8.39199 + 5.45142 \cdot E - 10.56627 \cdot E^2 + 3.88764 \cdot E^3 - 0.40133 \cdot E^4 + 0.03933 \cdot E \cdot I_1 - 0.01962 \cdot E^2 \cdot I_1 + 0.00245 \cdot E^3 \cdot I_1 - 0.00011 \cdot I_1^2$$

174

$$EF_{tens} = 562.03356 - 266.68752 \cdot E + 121.89898 \cdot E^2 - 50.84421 \cdot E^3 + 7.40561 \cdot E^4 + 0.0892 \cdot E \cdot I_1 + 0.04214 \cdot E^2 \cdot I_1 - 0.01916 \cdot E^3 \cdot I_1 - 0.00153 \cdot E \cdot I_1^2 + 0.00039 \cdot E^2 \cdot I_1^2$$

175

176

177 S5.3 Gent hyper-elastic model for PUR.

178

$$EF_{shear} = 952.07301 - 167.72434 \cdot E + 0.29917 \cdot E^2 - 0.0081 \cdot E^3 + 0.00019 \cdot E^4 \\ + 0.19236 \cdot I_1 + 0.12239 \cdot E \cdot I_1 - 0.00033 \cdot E^2 \cdot I_1 - 0.00406 \cdot I_1^2 \\ - 0.00117 \cdot E \cdot I_1^2 + 4e^{-5} \cdot I_1^3$$

179

$$EF_{comVol} = -131.47184 - 379.4103 \cdot E + 1998.31163 \cdot E^2 - 546.23856 \cdot E^3 \\ + 53.8166 \cdot E^4 - 4e^{-5} \cdot E \cdot I_1$$

180

$$EF_{comp} = 768.25364 - 211.78034 \cdot E + 13.88159 \cdot E^2 - 4.97277 \cdot E^3 + 0.64769 \cdot E^4 \\ + 0.99605 \cdot I_1 + 0.10973 \cdot E \cdot I_1 - 2e^{-5} \cdot E^3 \cdot I_1 - 0.0211 \cdot I_1^2 \\ - 0.00113 \cdot E \cdot I_1^2 + 2e^{-4} \cdot I_1^3$$

181

$$EF_{trac} = 44.14595 - 26.35027 \cdot E + 6.04914 \cdot E^2 - 0.93071 \cdot E^3 + 0.29402 \cdot E^4 \\ + 0.20345 \cdot E \cdot I_1 - 0.09803 \cdot E^2 \cdot I_1 - 5e^{-4} \cdot I_1^2 + 0.00025 \cdot E^2 \cdot I_1^2$$

182

$$EF_{tens} = 1150.10935 - 128.73997 \cdot E + 0.10502 \cdot I_1 + 0.06796 \cdot E \cdot I_1 - 0.00222 \\ \cdot I_1^2 - 0.00065 \cdot E \cdot I_1^2 + 2e^{-5} \cdot I_1^3$$

183

184 S5.4 Gent hyper-elastic model for SBR

185

$$EF_{shear} = 245.33787 + 315.03982 \cdot E - 440.56609 \cdot E^2 + 159.41681 \cdot E^3 \\ - 17.48769 \cdot E^4 + 0.1115 \cdot E \cdot I_1 - 0.07149 \cdot E^2 \cdot I_1 + 0.0083 \cdot E^3 \cdot I_1 \\ - 0.00028 \cdot I_1^2 + 7e^{-5} \cdot E^2 \cdot I_1^2$$

186

$$EF_{comVol} = 1092.51337 - 2967.75314 \cdot E + 3663.00216 \cdot E^2 - 1001.28181 \cdot E^3 \\ + 98.64845 \cdot E^4 - 4e^{-5} \cdot E \cdot I_1$$

187

$$EF_{comp} = 499.8732 - 768.75451 \cdot E + 420.72193 \cdot E^2 - 76.30303 \cdot E^3 + 4.75934 \\ \cdot E^4 - 0.06616 \cdot E^2 \cdot I_1 + 0.0102 \cdot E^3 \cdot I_1 + 0.00107 \cdot E \cdot I_1^2$$

188

$$EF_{trac} = 13.46596 - 31.84001 \cdot E + 41.66887 \cdot E^2 - 12.0611 \cdot E^3 + 1.22107 \cdot E^4 \\ + 0.39297 \cdot I_1 - 0.82184 \cdot E \cdot I_1 + 0.11071 \cdot E^2 \cdot I_1 - 0.00888 \cdot E^3 \cdot I_1 \\ - 0.00172 \cdot I_1^2 + 0.00588 \cdot E \cdot I_1^2 - 0.00028 \cdot E^2 \cdot I_1^2 - 2e^{-5} \cdot E \cdot I_1^3$$

189

$$EF_{tens} = 602.16882 - 317.01575 \cdot E + 173.83253 \cdot E^2 - 72.20933 \cdot E^3 + 10.43612 \\ \cdot E^4 + 0.0892 \cdot E \cdot I_1 + 0.04214 \cdot E^2 \cdot I_1 - 0.01916 \cdot E^3 \cdot I_1 - 0.00153 \cdot E \\ \cdot I_1^2 + 0.00039 \cdot E^2 \cdot I_1^2$$

190

191

192

193

194 S5.5 Ogden hyper-elastic model for NBR.

195

$$EF_{shear} = 367.42734 - 5152.96075 \cdot k_1^2 + 7890.83881 \cdot k_1^3 + 463.85768 \cdot k_2 \\ + 6119.73291 \cdot k_1 \cdot k_2 - 28912.28113 \cdot k_1^2 \cdot k_2 + 26531.08548 \cdot k_1^3 \\ \cdot k_2 + 6907.1563 \cdot k_1 \cdot k_2^2 - 13594.22433 \cdot k_1^2 \cdot k_2^2$$

196

$$EF_{comVol} = 2581.62332 - 37573.18872 \cdot k_1 + 170279.87916 \cdot k_1^2 - 241796.12966 \\ \cdot k_1^3 + 127131.93523 \cdot k_1^4 + 15621.60234 \cdot k_2 - 195859.04111 \cdot k_1 \\ \cdot k_2 + 432669.69466 \cdot k_1^2 \cdot k_2 - 262089.57722 \cdot k_1^3 \cdot k_2 \\ + 28541.94027 \cdot k_2^2 - 197711.69582 \cdot k_1 \cdot k_2^2 + 290587.69511 \cdot k_1^2 \\ \cdot k_2^2$$

197

$$EF_{comp} = 366.68459 - 5078.88291 \cdot k_1^2 + 7328.67562 \cdot k_1^3 + 690.89965 \cdot k_2 \\ + 8733.43345 \cdot k_1 \cdot k_2 - 36736.94016 \cdot k_1^2 \cdot k_2 + 23907.53842 \cdot k_1^3 \\ \cdot k_2 + 17779.24803 \cdot k_1 \cdot k_2^2 - 38272.40791 \cdot k_1^2 \cdot k_2^2$$

198

$$EF_{trac} = 28.5913 - 39.96472 \cdot k_1 - 1108.94844 \cdot k_1^2 + 4691.16536 \cdot k_1^3 \\ - 4660.30136 \cdot k_1^4 + 7.36883 \cdot k_2 + 90.62453 \cdot k_1 \cdot k_2 - 726.94527 \\ \cdot k_1^2 \cdot k_2 + 946.88324 \cdot k_1^3 \cdot k_2$$

199

$$EF_{tens} = 573.2217 - 852.02857 \cdot k_1 + 931.70282 \cdot k_1^2 - 1982.04384 \cdot k_1^3 \\ + 1462.31866 \cdot k_1^4 + 405.23114 \cdot k_2 - 537.63144 \cdot k_1 \cdot k_2 \\ + 2806.32998 \cdot k_1^2 \cdot k_2 - 2434.71154 \cdot k_1^3 \cdot k_2 - 688.13911 \cdot k_1 \cdot k_2^2 \\ + 2500.09091 \cdot k_1^2 \cdot k_2^2$$

200

201 S5.6 Ogden hyper-elastic model for EVA.

202

$$EF_{shear} = 500.26043 - 522.16823 \cdot k_1 - 448.26096 \cdot k_1^2 + 428.51384 \cdot k_2 \\ + 1473.1078 \cdot k_1 \cdot k_2 - 5850.38214 \cdot k_1^3 \cdot k_2 + 1789.74701 \cdot k_1 \cdot k_2^2$$

203

$$EF_{comVol} = 1616.69292 - 20415.08222 \cdot k_1 + 94735.17245 \cdot k_1^2 - 134648.98076 \\ \cdot k_1^3 + 71812.79252 \cdot k_1^4 + 11290.79012 \cdot k_2 - 109322.1388 \cdot k_1 \cdot k_2 \\ + 241085.77243 \cdot k_1^2 \cdot k_2 - 143625.56931 \cdot k_1^3 \cdot k_2 + 26557.57604 \\ \cdot k_2^2 - 110796.86661 \cdot k_1 \cdot k_2^2 + 164143.50291 \cdot k_1^2 \cdot k_2^2 \\ + 11366.58535 \cdot k_2^3$$

204

$$EF_{comp} = -49.94918 + 327.64699 \cdot k_1 + 1854.38526 \cdot k_1^2 - 2647.32065 \cdot k_1^3 \\ + 1392.55523 \cdot k_1^4 - 455.54137 \cdot k_2 - 2154.13915 \cdot k_1 \cdot k_2 \\ + 4693.37501 \cdot k_1^2 \cdot k_2 - 2901.87881 \cdot k_1^3 \cdot k_2 + 315.00427 \cdot k_2^2 \\ - 2148.82615 \cdot k_1 \cdot k_2^2 + 3050.43338 \cdot k_1^2 \cdot k_2^2$$



$$EF_{trac} = 11.61421 - 323.2176 \cdot k_1^2 + 967.3286 \cdot k_1^3 - 763.38933 \cdot k_1^4 + 66.26786 \cdot k_1 \cdot k_2 - 324.0273 \cdot k_1^2 \cdot k_2 + 337.80496 \cdot k_1^3 \cdot k_2 - 19.25412 \cdot k_2^2 + 19.65498 \cdot k_1 \cdot k_2^2 - 19.7614 \cdot k_2^3$$

205

$$EF_{tens} = 509.74359 - 1227.96208 \cdot k_1 + 3648.21224 \cdot k_1^2 - 8322.9179 \cdot k_1^3 + 6379.72333 \cdot k_1^4 + 165.31536 \cdot k_2 - 2404.17253 \cdot k_1 \cdot k_2 + 11705.84823 \cdot k_1^2 \cdot k_2 - 11653.71925 \cdot k_1^3 \cdot k_2 - 979.87191 \cdot k_2^2 - 2817.5445 \cdot k_1 \cdot k_2^2 + 9306.58759 \cdot k_1^2 \cdot k_2^2 - 1127.70583 \cdot k_2^3$$

206

207 *S5.7 Ogden hyper-elastic model for PUR.*

208

$$EF_{shear} = 955.53103 - 824.92775 \cdot k_1 + 135.92408 \cdot k_1^2 - 286.42552 \cdot k_1^3 + 212.07954 \cdot k_1^4 + 466.62242 \cdot k_2 + 96.85461 \cdot k_1 \cdot k_2 - 130.62892 \cdot k_1^2 \cdot k_2 + 23.53591 \cdot k_1^3 \cdot k_2 + 2.73597 \cdot k_2^2 + 77.41648 \cdot k_1 \cdot k_2^2 - 112.54282 \cdot k_1^2 \cdot k_2^2$$

209

$$EF_{comVol} = 1614.5898 - 24195.9722 \cdot k_1 + 124627.01377 \cdot k_1^2 - 176908.8083 \cdot k_1^3 + 92525.36384 \cdot k_1^4 + 9233.29106 \cdot k_2 - 143176.71591 \cdot k_1 \cdot k_2 + 316490.4907 \cdot k_1^2 \cdot k_2 - 192876.43444 \cdot k_1^3 \cdot k_2 + 20879.0566 \cdot k_2^2 - 144318.69996 \cdot k_1 \cdot k_2^2 + 211486.9605 \cdot k_1^2 \cdot k_2^2$$

210

$$EF_{comp} = 781.24808 - 1097.85589 \cdot k_1 + 1549.97414 \cdot k_1^2 - 3172.75346 \cdot k_1^3 + 2263.64834 \cdot k_1^4 + 718.03261 \cdot k_2 - 1127.8068 \cdot k_1 \cdot k_2 + 5448.10541 \cdot k_1^2 \cdot k_2 - 4734.37263 \cdot k_1^3 \cdot k_2 - 1293.98871 \cdot k_1 \cdot k_2^2 + 4668.65913 \cdot k_1^2 \cdot k_2^2$$

211

$$EF_{trac} = 41.98032 - 27.79486 \cdot k_1 - 1014.51265 \cdot k_1^2 + 3444.69074 \cdot k_1^3 - 2978.76489 \cdot k_1^4 + 6.74623 \cdot k_2 + 88.20951 \cdot k_1 \cdot k_2 - 444.93251 \cdot k_1^2 \cdot k_2 + 439.18303 \cdot k_1^3 \cdot k_2$$

212

$$EF_{tens} = 1151.96645 - 620.98687 \cdot k_1 + 65.71428 \cdot k_1^2 - 158.74504 \cdot k_1^3 + 125.63622 \cdot k_1^4 + 356.77436 \cdot k_2 + 56.62993 \cdot k_1 \cdot k_2 - 91.02943 \cdot k_1^2 \cdot k_2 + 36.80589 \cdot k_1^3 \cdot k_2 + 37.37657 \cdot k_1 \cdot k_2^2 - 57.92156 \cdot k_1^2 \cdot k_2^2$$

213

214

215 S5.8 Ogden hyper-elastic model for SBR.

216

$$EF_{shear} = 393.17542 - 4029.63965 \cdot k_1^2 + 5646.97637 \cdot k_1^3 + 404.53928 \cdot k_2 \\ + 4315.4355 \cdot k_1 \cdot k_2 - 18475.87259 \cdot k_1^2 \cdot k_2 + 15758.0234 \cdot k_1^3 \cdot k_2 \\ + 4396.72026 \cdot k_1 \cdot k_2^2 - 7812.45505 \cdot k_1^2 \cdot k_2^2$$

217

$$EF_{comVol} = 2283.41882 - 33448.05129 \cdot k_1 + 156201.88741 \cdot k_1^2 - 221786.80128 \\ \cdot k_1^3 + 116460.29343 \cdot k_1^4 + 13651.63632 \cdot k_2 - 179613.37212 \cdot k_1 \\ \cdot k_2 + 396843.46861 \cdot k_1^2 \cdot k_2 - 240746.29362 \cdot k_1^3 \cdot k_2 \\ + 26178.93387 \cdot k_2^2 - 181246.87704 \cdot k_1 \cdot k_2^2 + 266195.371 \cdot k_1^2 \\ \cdot k_2^2$$

218

$$EF_{comp} = 379.29256 - 2475.54838 \cdot k_1 + 4535.18305 \cdot k_1^2 - 2294.96025 \cdot k_1^4 \\ + 1654.31068 \cdot k_2 - 8636.14369 \cdot k_1 \cdot k_2 + 7076.52587 \cdot k_1^2 \cdot k_2 \\ + 2097.40454 \cdot k_2^2 - 4798.09832 \cdot k_1 \cdot k_2^2$$

219

$$EF_{trac} = 15.26002 - 279.76921 \cdot k_1 + 1926.94633 \cdot k_1^2 - 4137.57559 \cdot k_1^3 \\ + 3194.13256 \cdot k_1^4 + 7.12619 \cdot k_2 - 83.52135 \cdot k_1 \cdot k_2 + 165.49685 \\ \cdot k_1^2 \cdot k_2 - 149.96712 \cdot k_1^3 \cdot k_2 + 42.69854 \cdot k_1 \cdot k_2^2 - 92.17532 \cdot k_1^2 \\ \cdot k_2^2$$

220

$$EF_{tens} = 549.61218 - 903.07119 \cdot k_1 + 1870.26214 \cdot k_1^2 - 4987.2196 \cdot k_1^3 \\ + 3921.60778 \cdot k_1^4 + 405.05656 \cdot k_2 - 652.1197 \cdot k_1 \cdot k_2 \\ + 6073.58795 \cdot k_1^2 \cdot k_2 - 8972.76722 \cdot k_1^3 \cdot k_2 - 572.35034 \cdot k_1 \cdot k_2^2 \\ + 3938.94766 \cdot k_1^2 \cdot k_2^2$$

221

222

223 S5.9 Mooney-Rivlin hyper-elastic model for NBR.

224

$$\begin{aligned}
 EF_{shear} = & 183.52116 - 693.53046 \cdot C_{10} + 1400.42875 \cdot C_{10}^2 - 278.43835 \cdot C_{10}^4 \\
 & - 640.16174 \cdot C_{01} + 3456.7162 \cdot C_{10} \cdot C_{01} - 2482.67744 \cdot C_{10}^2 \cdot C_{01} \\
 & + 609.80965 \cdot C_{10}^3 \cdot C_{01} + 1443.64739 \cdot C_{01}^2 - 2414.77072 \cdot C_{10} \cdot C_{01}^2 \\
 & + 802.19476 \cdot C_{10}^2 \cdot C_{01}^2 + 570.90191 \cdot C_{10} \cdot C_{01}^3 - 429.79401 \cdot C_{01}^4 \\
 & + 2053.13932 \cdot C_{10} \cdot C_{11} - 882.06251 \cdot C_{10}^2 \cdot C_{11} + 1163.36567 \cdot C_{01} \\
 & \cdot C_{11} - 1288.34095 \cdot C_{10} \cdot C_{01} \cdot C_{11} + 911.5076 \cdot C_{11}^2 - 3050.22947 \\
 & \cdot C_{10} \cdot C_{11}^2 + 1662.59232 \cdot C_{10}^2 \cdot C_{11}^2 - 1734.73345 \cdot C_{01} \cdot C_{11}^2 \\
 & + 1520.55779 \cdot C_{10} \cdot C_{01} \cdot C_{11}^2 + 559.5721 \cdot C_{01}^2 \cdot C_{11}^2
 \end{aligned}$$

225

$$\begin{aligned}
 EF_{comVol} = & -1670.36632 + 12736.21437 \cdot C_{10} + 7602.62765 \cdot C_{10}^2 - 6175.18798 \\
 & \cdot C_{10}^3 + 1711.70271 \cdot C_{10}^4 + 14977.88218 \cdot C_{01} + 6784.19505 \cdot C_{10} \\
 & \cdot C_{01} - 8314.5558 \cdot C_{10}^2 \cdot C_{01} + 3142.55075 \cdot C_{10}^3 \cdot C_{01} + 1639.17496 \\
 & \cdot C_{01}^2 - 2722.01456 \cdot C_{10} \cdot C_{01}^2 + 1535.43174 \cdot C_{10}^2 \cdot C_{01}^2 \\
 & - 2502.70944 \cdot C_{01}^3 + 1707.68537 \cdot C_{01}^4
 \end{aligned}$$

226

$$\begin{aligned}
 EF_{comp} = & 103.20989 + 879.48322 \cdot C_{10}^2 - 214.64751 \cdot C_{10}^3 - 253.99821 \cdot C_{01} \\
 & + 2910.10452 \cdot C_{10} \cdot C_{01} - 1551.76327 \cdot C_{10}^2 \cdot C_{01} + 245.33878 \cdot C_{10}^3 \\
 & \cdot C_{01} + 1903.78218 \cdot C_{01}^2 - 2151.15598 \cdot C_{10} \cdot C_{01}^2 + 580.48796 \cdot C_{10}^2 \\
 & \cdot C_{01}^2 - 700.25323 \cdot C_{01}^3 + 471.55589 \cdot C_{10} \cdot C_{01}^3 - 698.90049 \cdot C_{11} \\
 & + 2372.54385 \cdot C_{10} \cdot C_{11} - 760.1869 \cdot C_{10}^2 \cdot C_{11} + 4184.24278 \cdot C_{01} \\
 & \cdot C_{11} - 4217.4931 \cdot C_{10} \cdot C_{01} \cdot C_{11} + 924.87521 \cdot C_{10}^2 \cdot C_{01} \cdot C_{11} \\
 & - 3026.17171 \cdot C_{01}^2 \cdot C_{11} + 1482.38309 \cdot C_{10} \cdot C_{01}^2 \cdot C_{11} + 619.29957 \\
 & \cdot C_{01}^3 \cdot C_{11} + 1525.29295 \cdot C_{11}^2 - 1444.2328 \cdot C_{10} \cdot C_{11}^2 - 3155.93335 \\
 & \cdot C_{01} \cdot C_{11}^2 + 1841.99624 \cdot C_{10} \cdot C_{01} \cdot C_{11}^2 + 1312.51796 \cdot C_{01}^2 \cdot C_{11}^2
 \end{aligned}$$

227

$$\begin{aligned}
 EF_{trac} = & 19.3254 - 36.88252 \cdot C_{10} + 22.88505 \cdot C_{10}^2 + 45.20189 \cdot C_{10}^3 - 21.76448 \\
 & \cdot C_{10}^4 - 25.85826 \cdot C_{01} + 66.5464 \cdot C_{10} \cdot C_{01} - 23.43407 \cdot C_{10}^2 \cdot C_{01} \\
 & + 13.52604 \cdot C_{01}^2 - 12.79691 \cdot C_{10} \cdot C_{01}^2 - 46.10194 \cdot C_{11} + 733.56847 \\
 & \cdot C_{10} \cdot C_{11} - 256.65739 \cdot C_{10}^2 \cdot C_{11} + 305.5666 \cdot C_{01} \cdot C_{11} - 310.44061 \\
 & \cdot C_{10} \cdot C_{01} \cdot C_{11} + 79.32516 \cdot C_{10}^2 \cdot C_{01} \cdot C_{11} - 53.26243 \cdot C_{01}^2 \cdot C_{11} \\
 & + 48.06354 \cdot C_{10} \cdot C_{01}^2 \cdot C_{11} + 1561.50985 \cdot C_{11}^2 - 1585.0807 \cdot C_{10} \\
 & \cdot C_{11}^2 + 289.82983 \cdot C_{10}^2 \cdot C_{11}^2 - 507.29949 \cdot C_{01} \cdot C_{11}^2 + 206.29549 \\
 & \cdot C_{10} \cdot C_{01} \cdot C_{11}^2 - 2327.54218 \cdot C_{11}^3 + 1199.70524 \cdot C_{10} \cdot C_{11}^3 \\
 & + 357.56136 \cdot C_{01} \cdot C_{11}^3 + 1177.73578 \cdot C_{11}^4
 \end{aligned}$$

$$\begin{aligned}
EF_{tens} = & 832.38853 - 2928.96076 \cdot C_{10} + 3625.24508 \cdot C_{10}^2 - 1474.22101 \cdot C_{10}^3 \\
& + 222.8628 \cdot C_{10}^4 - 2756.07978 \cdot C_{01} + 7012.25395 \cdot C_{10} \cdot C_{01} \\
& - 4311.33566 \cdot C_{10}^2 \cdot C_{01} + 834.43158 \cdot C_{10}^3 \cdot C_{01} + 3232.13812 \cdot C_{01}^2 \\
& - 4100.53672 \cdot C_{10} \cdot C_{01}^2 + 1221.59319 \cdot C_{10}^2 \cdot C_{01}^2 - 1261.07643 \\
& \cdot C_{01}^3 + 794.24004 \cdot C_{10} \cdot C_{01}^3 + 175.17826 \cdot C_{01}^4 - 2182.45536 \cdot C_{11} \\
& + 5775.64572 \cdot C_{10} \cdot C_{11} - 3444.18044 \cdot C_{10}^2 \cdot C_{11} + 638.65362 \cdot C_{10}^3 \\
& \cdot C_{11} + 5064.22906 \cdot C_{01} \cdot C_{11} - 6767.25387 \cdot C_{10} \cdot C_{01} \cdot C_{11} \\
& + 2064.88617 \cdot C_{10}^2 \cdot C_{01} \cdot C_{11} - 2433.42779 \cdot C_{01}^2 \cdot C_{11} + 1750.19183 \\
& \cdot C_{10} \cdot C_{01}^2 \cdot C_{11} + 383.5516 \cdot C_{01}^3 \cdot C_{11} + 2132.25963 \cdot C_{11}^2 \\
& - 2701.53369 \cdot C_{10} \cdot C_{11}^2 + 751.67271 \cdot C_{10}^2 \cdot C_{11}^2 - 2051.35937 \cdot C_{01} \\
& \cdot C_{11}^2 + 1714.98241 \cdot C_{10} \cdot C_{01} \cdot C_{11}^2
\end{aligned}$$

228

229 *S5.10 Mooney-Rivlin hyper-elastic model for EVA.*

230

$$\begin{aligned}
EF_{shear} = & 595.96368 - 2178.67359 \cdot C_{10} + 2865.80232 \cdot C_{10}^2 - 883.96588 \cdot C_{10}^3 \\
& - 2098.17268 \cdot C_{01} + 5966.93267 \cdot C_{10} \cdot C_{01} - 3807.74099 \cdot C_{10}^2 \cdot C_{01} \\
& + 775.44103 \cdot C_{10}^3 \cdot C_{01} + 2701.24867 \cdot C_{01}^2 - 3650.48531 \cdot C_{10} \cdot C_{01}^2 \\
& + 1120.27509 \cdot C_{10}^2 \cdot C_{01}^2 - 831.78589 \cdot C_{01}^3 + 716.71532 \cdot C_{10} \cdot C_{01}^3 \\
& - 1379.9238 \cdot C_{11} + 4679.20347 \cdot C_{10} \cdot C_{11} - 2862.35422 \cdot C_{10}^2 \cdot C_{11} \\
& + 472.44967 \cdot C_{10}^3 \cdot C_{11} + 4200.79571 \cdot C_{01} \cdot C_{11} - 5431.76083 \cdot C_{10} \\
& \cdot C_{01} \cdot C_{11} + 1635.15355 \cdot C_{10}^2 \cdot C_{01} \cdot C_{11} - 1954.13109 \cdot C_{01}^2 \cdot C_{11} \\
& + 1355.94807 \cdot C_{10} \cdot C_{01}^2 \cdot C_{11} + 1658.44324 \cdot C_{11}^2 - 3098.96029 \cdot C_{10} \\
& \cdot C_{11}^2 + 1264.53916 \cdot C_{10}^2 \cdot C_{11}^2 - 2686.18451 \cdot C_{01} \cdot C_{11}^2 \\
& + 1886.83392 \cdot C_{10} \cdot C_{01} \cdot C_{11}^2 + 996.8374 \cdot C_{01}^2 \cdot C_{11}^2
\end{aligned}$$

231

$$\begin{aligned}
EF_{comVol} = & -996.34559 + 7952.81782 \cdot C_{10} + 3852.90706 \cdot C_{10}^2 - 3129.4986 \cdot C_{10}^3 \\
& + 867.46646 \cdot C_{10}^4 + 9088.86153 \cdot C_{01} + 3438.14364 \cdot C_{10} \cdot C_{01} \\
& - 4213.70757 \cdot C_{10}^2 \cdot C_{01} + 1592.60195 \cdot C_{10}^3 \cdot C_{01} + 830.72076 \cdot C_{01}^2 \\
& - 1379.48519 \cdot C_{10} \cdot C_{01}^2 + 778.13975 \cdot C_{10}^2 \cdot C_{01}^2 - 1268.35574 \cdot C_{01}^3 \\
& + 865.44065 \cdot C_{01}^4
\end{aligned}$$

232

$$\begin{aligned}
EF_{comp} = & -104.02636 + 1163.7845 \cdot C_{10} - 11.39835 \cdot C_{10}^2 + 8.05562 \cdot C_{10}^3 \\
& - 2.05642 \cdot C_{10}^4 + 1451.80406 \cdot C_{01} - 19.85195 \cdot C_{10} \cdot C_{01} + 17.24875 \\
& \cdot C_{10}^2 \cdot C_{01} - 5.46286 \cdot C_{10}^3 \cdot C_{01} - 28.52999 \cdot C_{01}^2 + 22.90205 \cdot C_{10} \\
& \cdot C_{01}^2 - 6.84659 \cdot C_{10}^2 \cdot C_{01}^2 + 21.90531 \cdot C_{01}^3 - 6.66201 \cdot C_{10} \cdot C_{01}^3 \\
& - 6.37661 \cdot C_{01}^4 + 912.21997 \cdot C_{11} + 65.09823 \cdot C_{10} \cdot C_{11} - 26.84801 \\
& \cdot C_{10}^2 \cdot C_{11} + 5.79171 \cdot C_{10}^3 \cdot C_{11} + 87.65009 \cdot C_{01} \cdot C_{11} - 68.45968 \cdot C_{10} \\
& \cdot C_{01} \cdot C_{11} + 18.16545 \cdot C_{10}^2 \cdot C_{01} \cdot C_{11} - 11.94747 \cdot C_{01}^2 \cdot C_{11} + 8.75069 \\
& \cdot C_{10} \cdot C_{01}^2 \cdot C_{11} - 8.82394 \cdot C_{01}^3 \cdot C_{11} - 235.18325 \cdot C_{11}^2 - 24.86589 \\
& \cdot C_{10} \cdot C_{11}^2 - 61.00259 \cdot C_{01} \cdot C_{11}^2 + 33.89034 \cdot C_{10} \cdot C_{01} \cdot C_{11}^2 \\
& + 18.62427 \cdot C_{01}^2 \cdot C_{11}^2 + 451.50186 \cdot C_{11}^3 - 314.84447 \cdot C_{11}^4
\end{aligned}$$

$$\begin{aligned}
EF_{trac} = & 10.7161 - 38.18766 \cdot C_{10} + 59.85163 \cdot C_{10}^2 - 18.26953 \cdot C_{10}^3 - 22.45239 \\
& \cdot C_{01} + 74.93665 \cdot C_{10} \cdot C_{01} - 49.18618 \cdot C_{10}^2 \cdot C_{01} + 10.25661 \cdot C_{10}^3 \\
& \cdot C_{01} + 13.19616 \cdot C_{01}^2 - 20.98564 \cdot C_{10} \cdot C_{01}^2 + 7.3664 \cdot C_{10}^2 \cdot C_{01}^2 \\
& - 65.34749 \cdot C_{11} + 264.52875 \cdot C_{10} \cdot C_{11} - 148.04887 \cdot C_{10}^2 \cdot C_{11} \\
& + 25.48434 \cdot C_{10}^3 \cdot C_{11} + 149.48438 \cdot C_{01} \cdot C_{11} - 172.99774 \cdot C_{10} \cdot C_{01} \\
& \cdot C_{11} + 49.97172 \cdot C_{10}^2 \cdot C_{01} \cdot C_{11} - 20.98999 \cdot C_{01}^2 \cdot C_{11} + 19.88664 \\
& \cdot C_{10} \cdot C_{01}^2 \cdot C_{11} + 267.14785 \cdot C_{11}^2 - 385.7986 \cdot C_{10} \cdot C_{11}^2 + 102.37209 \\
& \cdot C_{10}^2 \cdot C_{11}^2 - 223.90305 \cdot C_{01} \cdot C_{11}^2 + 116.73425 \cdot C_{10} \cdot C_{01} \cdot C_{11}^2 \\
& - 195.32117 \cdot C_{11}^3 + 191.30201 \cdot C_{10} \cdot C_{11}^3 + 124.47905 \cdot C_{01} \cdot C_{11}^3
\end{aligned}$$

233

$$\begin{aligned}
EF_{tens} = & 702.044 - 2544.31158 \cdot C_{10} + 3304.55875 \cdot C_{10}^2 - 1327.07049 \cdot C_{10}^3 \\
& + 186.42887 \cdot C_{10}^4 - 2409.58568 \cdot C_{01} + 6417.23337 \cdot C_{10} \cdot C_{01} \\
& - 4024.92722 \cdot C_{10}^2 \cdot C_{01} + 799.34989 \cdot C_{10}^3 \cdot C_{01} + 2973.3778 \cdot C_{01}^2 \\
& - 3767.64131 \cdot C_{10} \cdot C_{01}^2 + 1144.90762 \cdot C_{10}^2 \cdot C_{01}^2 - 1160.06987 \\
& \cdot C_{01}^3 + 708.41455 \cdot C_{10} \cdot C_{01}^3 + 166.62487 \cdot C_{01}^4 - 1873.72258 \cdot C_{11} \\
& + 5446.58523 \cdot C_{10} \cdot C_{11} - 3295.48509 \cdot C_{10}^2 \cdot C_{11} + 583.87953 \cdot C_{10}^3 \\
& \cdot C_{11} + 4936.99716 \cdot C_{01} \cdot C_{11} - 6444.54512 \cdot C_{10} \cdot C_{01} \cdot C_{11} \\
& + 1977.7766 \cdot C_{10}^2 \cdot C_{01} \cdot C_{11} - 2593.77736 \cdot C_{01}^2 \cdot C_{11} + 1672.55113 \\
& \cdot C_{10} \cdot C_{01}^2 \cdot C_{11} + 379.73004 \cdot C_{01}^3 \cdot C_{11} + 2093.93193 \cdot C_{11}^2 \\
& - 3007.62806 \cdot C_{10} \cdot C_{11}^2 + 974.08201 \cdot C_{10}^2 \cdot C_{11}^2 - 2596.41312 \cdot C_{01} \\
& \cdot C_{11}^2 + 1935.16706 \cdot C_{10} \cdot C_{01} \cdot C_{11}^2 + 563.60358 \cdot C_{01}^2 \cdot C_{11}^2
\end{aligned}$$

234

235 *S5.11 Mooney-Rivlin hyper-elastic model for PUR.*

236

$$\begin{aligned}
EF_{shear} = & 1208.56785 - 2358.43336 \cdot C_{10} + 1635.10817 \cdot C_{10}^2 - 676.81596 \cdot C_{10}^3 \\
& + 314.08539 \cdot C_{10}^4 - 2276.18241 \cdot C_{01} + 2875.10359 \cdot C_{10} \cdot C_{01} \\
& - 304.12894 \cdot C_{10}^3 \cdot C_{01} + 1665.21675 \cdot C_{01}^2 - 441.46439 \cdot C_{10}^2 \cdot C_{01}^2 \\
& - 1069.51707 \cdot C_{01}^3 - 253.59778 \cdot C_{10} \cdot C_{01}^3 + 599.00937 \cdot C_{01}^4 \\
& - 2577.35671 \cdot C_{11} + 4354.26408 \cdot C_{10} \cdot C_{11} - 1367.01744 \cdot C_{10}^2 \cdot C_{11} \\
& + 4472.63173 \cdot C_{01} \cdot C_{11} - 4575.43531 \cdot C_{10} \cdot C_{01} \cdot C_{11} + 1140.19828 \\
& \cdot C_{10}^2 \cdot C_{01} \cdot C_{11} - 2271.6789 \cdot C_{01}^2 \cdot C_{11} + 1207.39338 \cdot C_{10} \cdot C_{01}^2 \cdot C_{11} \\
& + 807.622 \cdot C_{01}^3 \cdot C_{11} + 1914.79821 \cdot C_{11}^2 - 927.45139 \cdot C_{10}^2 \cdot C_{11}^2 \\
& - 1354.59148 \cdot C_{01}^2 \cdot C_{11}^2
\end{aligned}$$

237

$$\begin{aligned}
EF_{comVol} = & -1635.4183 + 14742.42083 \cdot C_{10} + 3400.57868 \cdot C_{10}^2 - 2762.10398 \\
& \cdot C_{10}^3 + 765.63003 \cdot C_{10}^4 + 15745.10924 \cdot C_{01} + 3034.48267 \cdot C_{10} \cdot C_{01} \\
& - 3719.00015 \cdot C_{10}^2 \cdot C_{01} + 1405.62769 \cdot C_{10}^3 \cdot C_{01} + 733.17345 \cdot C_{01}^2 \\
& - 1217.5158 \cdot C_{10} \cdot C_{01}^2 + 686.77408 \cdot C_{10}^2 \cdot C_{01}^2 - 1119.41507 \cdot C_{01}^3 \\
& + 763.81804 \cdot C_{01}^4
\end{aligned}$$

238

$$\begin{aligned}
EF_{comp} = & 1121.17055 - 3849.54392 \cdot C_{10} + 4643.0158 \cdot C_{10}^2 - 1817.95654 \cdot C_{10}^3 \\
& + 263.56871 \cdot C_{10}^4 - 4826.17938 \cdot C_{01} + 11945.94396 \cdot C_{10} \cdot C_{01} \\
& - 7077.95078 \cdot C_{10}^2 \cdot C_{01} + 1274.30966 \cdot C_{10}^3 \cdot C_{01} + 7247.11944 \\
& \cdot C_{01}^2 - 9000.94792 \cdot C_{10} \cdot C_{01}^2 + 2666.41478 \cdot C_{10}^2 \cdot C_{01}^2 \\
& - 3460.55385 \cdot C_{01}^3 + 2113.84232 \cdot C_{10} \cdot C_{01}^3 + 557.68092 \cdot C_{01}^4 \\
& - 2062.00744 \cdot C_{11} + 4922.97392 \cdot C_{10} \cdot C_{11} - 2500.83808 \cdot C_{10}^2 \cdot C_{11} \\
& + 393.52228 \cdot C_{10}^3 \cdot C_{11} + 6447.0182 \cdot C_{01} \cdot C_{11} - 7624.06867 \cdot C_{10} \\
& \cdot C_{01} \cdot C_{11} + 2037.43226 \cdot C_{10}^2 \cdot C_{01} \cdot C_{11} - 4226.83673 \cdot C_{01}^2 \cdot C_{11} \\
& + 2743.92478 \cdot C_{10} \cdot C_{01}^2 \cdot C_{11} + 849.54197 \cdot C_{01}^3 \cdot C_{11} + 1450.3687 \\
& \cdot C_{11}^2 - 1151.90474 \cdot C_{10} \cdot C_{11}^2 - 1559.48067 \cdot C_{01} \cdot C_{11}^2 + 1050.34018 \\
& \cdot C_{10} \cdot C_{01} \cdot C_{11}^2
\end{aligned}$$

239

$$\begin{aligned}
EF_{trac} = & 40.48927 - 70.25492 \cdot C_{10} + 78.80384 \cdot C_{10}^3 - 31.1337 \cdot C_{10}^4 - 21.23926 \\
& \cdot C_{01} + 51.18467 \cdot C_{10}^2 \cdot C_{01} - 21.10467 \cdot C_{10}^3 \cdot C_{01} + 28.81611 \cdot C_{10} \\
& \cdot C_{01}^2 - 23.23655 \cdot C_{10}^2 \cdot C_{01}^2 - 413.06956 \cdot C_{11} + 1119.06742 \cdot C_{10} \\
& \cdot C_{11} - 350.86279 \cdot C_{10}^2 \cdot C_{11} + 342.83133 \cdot C_{01} \cdot C_{11} - 254.57283 \cdot C_{10} \\
& \cdot C_{01} \cdot C_{11} + 38.96202 \cdot C_{10}^2 \cdot C_{01} \cdot C_{11} - 40.1304 \cdot C_{01}^2 \cdot C_{11} + 28.53367 \\
& \cdot C_{10} \cdot C_{01}^2 \cdot C_{11} + 3036.21102 \cdot C_{11}^2 - 2645.75059 \cdot C_{10} \cdot C_{11}^2 \\
& + 442.12347 \cdot C_{10}^2 \cdot C_{11}^2 - 637.70026 \cdot C_{01} \cdot C_{11}^2 + 208.43968 \cdot C_{10} \\
& \cdot C_{01} \cdot C_{11}^2 - 4802.05427 \cdot C_{11}^3 + 2087.10966 \cdot C_{10} \cdot C_{11}^3 + 470.4058 \\
& \cdot C_{01} \cdot C_{11}^3 + 2640.16143 \cdot C_{11}^4
\end{aligned}$$

240

$$\begin{aligned}
EF_{tens} = & 1072.40184 - 1572.19641 \cdot C_{10}^2 + 1065.74331 \cdot C_{10}^3 - 198.00613 \cdot C_{10}^4 \\
& - 3233.77545 \cdot C_{10} \cdot C_{01} + 3227.42206 \cdot C_{10}^2 \cdot C_{01} - 703.05089 \cdot C_{10}^3 \\
& \cdot C_{01} - 1400.7919 \cdot C_{01}^2 + 3068.38116 \cdot C_{10} \cdot C_{01}^2 - 1049.83467 \cdot C_{10}^2 \\
& \cdot C_{01}^2 + 903.53428 \cdot C_{01}^3 - 689.34375 \cdot C_{10} \cdot C_{01}^3 - 152.18398 \cdot C_{01}^4 \\
& - 379.1367 \cdot C_{11} - 1914.17042 \cdot C_{10} \cdot C_{11} + 2451.43561 \cdot C_{10}^2 \cdot C_{11} \\
& - 560.60634 \cdot C_{10}^3 \cdot C_{11} - 1559.48796 \cdot C_{01} \cdot C_{11} + 4926.4631 \cdot C_{10} \\
& \cdot C_{01} \cdot C_{11} - 2023.50996 \cdot C_{10}^2 \cdot C_{01} \cdot C_{11} + 1662.69914 \cdot C_{01}^2 \cdot C_{11} \\
& - 1701.87461 \cdot C_{10} \cdot C_{01}^2 \cdot C_{11} - 341.45735 \cdot C_{01}^3 \cdot C_{11} + 1146.07752 \\
& \cdot C_{10} \cdot C_{11}^2 - 656.19947 \cdot C_{10}^2 \cdot C_{11}^2 + 694.24232 \cdot C_{01} \cdot C_{11}^2 \\
& - 1041.67299 \cdot C_{10} \cdot C_{01} \cdot C_{11}^2
\end{aligned}$$

241

242 S5.12 Mooney-Rivlin hyper-elastic model for SBR.

243

$$\begin{aligned}
 EF_{shear} = & 369.23988 - 1239.47992 \cdot C_{10} + 1900.3982 \cdot C_{10}^2 - 576.89576 \cdot C_{10}^3 \\
 & - 1231.95871 \cdot C_{01} + 4044.94005 \cdot C_{10} \cdot C_{01} - 2689.86999 \cdot C_{10}^2 \cdot C_{01} \\
 & + 595.3994 \cdot C_{10}^3 \cdot C_{01} + 1656.7623 \cdot C_{01}^2 - 2393.14325 \cdot C_{10} \cdot C_{01}^2 \\
 & + 766.62795 \cdot C_{10}^2 \cdot C_{01}^2 + 433.67074 \cdot C_{10} \cdot C_{01}^3 - 370.03922 \cdot C_{01}^4 \\
 & - 631.02847 \cdot C_{11} + 2658.51259 \cdot C_{10} \cdot C_{11} - 1235.27385 \cdot C_{10}^2 \cdot C_{11} \\
 & + 2549.84281 \cdot C_{01} \cdot C_{11} - 3003.08718 \cdot C_{10} \cdot C_{01} \cdot C_{11} + 824.04635 \\
 & \cdot C_{10}^2 \cdot C_{01} \cdot C_{11} - 1173.8078 \cdot C_{01}^2 \cdot C_{11} + 616.97518 \cdot C_{10} \cdot C_{01}^2 \cdot C_{11} \\
 & + 999.23686 \cdot C_{11}^2 - 2276.86829 \cdot C_{10} \cdot C_{11}^2 + 1041.23121 \cdot C_{10}^2 \cdot C_{11}^2 \\
 & - 2258.3776 \cdot C_{01} \cdot C_{11}^2 + 1432.59858 \cdot C_{10} \cdot C_{01} \cdot C_{11}^2 + 1134.06838 \\
 & \cdot C_{01}^2 \cdot C_{11}^2
 \end{aligned}$$

244

$$\begin{aligned}
 EF_{comVol} = & -1664.28672 + 13389.87436 \cdot C_{10} + 6233.52066 \cdot C_{10}^2 - 5063.14069 \\
 & \cdot C_{10}^3 + 1403.45434 \cdot C_{10}^4 + 15227.85926 \cdot C_{01} + 5562.46787 \cdot C_{10} \\
 & \cdot C_{01} - 6817.23689 \cdot C_{10}^2 \cdot C_{01} + 2576.62838 \cdot C_{10}^3 \cdot C_{01} + 1343.98254 \\
 & \cdot C_{01}^2 - 2231.82042 \cdot C_{10} \cdot C_{01}^2 + 1258.92303 \cdot C_{10}^2 \cdot C_{01}^2 \\
 & - 2052.00598 \cdot C_{01}^3 + 1400.15555 \cdot C_{01}^4
 \end{aligned}$$

245

$$\begin{aligned}
 EF_{comp} = & -41.84491 + 618.05442 \cdot C_{10} + 358.88382 \cdot C_{10}^2 - 68.63083 \cdot C_{10}^3 \\
 & + 655.08806 \cdot C_{01} + 1189.7664 \cdot C_{10} \cdot C_{01} - 566.94943 \cdot C_{10}^2 \cdot C_{01} \\
 & + 75.1354 \cdot C_{10}^3 \cdot C_{01} + 840.34603 \cdot C_{01}^2 - 823.685 \cdot C_{10} \cdot C_{01}^2 \\
 & + 201.54243 \cdot C_{10}^2 \cdot C_{01}^2 - 303.47064 \cdot C_{01}^3 + 174.29645 \cdot C_{10} \cdot C_{01}^3 \\
 & - 627.5097 \cdot C_{11} + 2164.3238 \cdot C_{10} \cdot C_{11} - 748.40826 \cdot C_{10}^2 \cdot C_{11} \\
 & + 3177.94743 \cdot C_{01} \cdot C_{11} - 2643.51063 \cdot C_{10} \cdot C_{01} \cdot C_{11} + 534.89504 \\
 & \cdot C_{10}^2 \cdot C_{01} \cdot C_{11} - 1965.44476 \cdot C_{01}^2 \cdot C_{11} + 784.36061 \cdot C_{10} \cdot C_{01}^2 \cdot C_{11} \\
 & + 374.67661 \cdot C_{01}^3 \cdot C_{11} + 3174.11625 \cdot C_{11}^2 - 3002.56543 \cdot C_{10} \cdot C_{11}^2 \\
 & + 549.32786 \cdot C_{10}^2 \cdot C_{11}^2 - 4382.7177 \cdot C_{01} \cdot C_{11}^2 + 1642.45221 \cdot C_{10} \\
 & \cdot C_{01} \cdot C_{11}^2 + 1235.40478 \cdot C_{01}^2 \cdot C_{11}^2 - 2295.59015 \cdot C_{11}^3 \\
 & + 1379.58005 \cdot C_{10} \cdot C_{11}^3 + 2009.55928 \cdot C_{01} \cdot C_{11}^3
 \end{aligned}$$

246

$$\begin{aligned}
 EF_{trac} = & 0.37636 + 23.65289 \cdot C_{10} + 21.79452 \cdot C_{10}^2 - 2.38894 \cdot C_{10}^4 - 12.34415 \\
 & \cdot C_{01} + 45.66054 \cdot C_{10} \cdot C_{01} - 16.06698 \cdot C_{10}^2 \cdot C_{01} + 12.70574 \cdot C_{01}^2 \\
 & - 12.25116 \cdot C_{10} \cdot C_{01}^2 + 306.12097 \cdot C_{11} + 245.21048 \cdot C_{10} \cdot C_{11} \\
 & - 113.32477 \cdot C_{10}^2 \cdot C_{11} + 18.64686 \cdot C_{10}^3 \cdot C_{11} + 222.06786 \cdot C_{01} \cdot C_{11} \\
 & - 216.96653 \cdot C_{10} \cdot C_{01} \cdot C_{11} + 61.60931 \cdot C_{10}^2 \cdot C_{01} \cdot C_{11} - 52.95916 \\
 & \cdot C_{01}^2 \cdot C_{11} + 48.38727 \cdot C_{10} \cdot C_{01}^2 \cdot C_{11} + 162.41135 \cdot C_{11}^2 - 358.33089 \\
 & \cdot C_{10} \cdot C_{11}^2 + 52.0841 \cdot C_{10}^2 \cdot C_{11}^2 - 358.67911 \cdot C_{01} \cdot C_{11}^2 + 102.56671 \\
 & \cdot C_{10} \cdot C_{01} \cdot C_{11}^2 + 256.41066 \cdot C_{10} \cdot C_{11}^3 + 298.01128 \cdot C_{01} \cdot C_{11}^3 \\
 & - 201.4063 \cdot C_{11}^4
 \end{aligned}$$

$$\begin{aligned}
EF_{tens} = & 678.99302 - 2201.94287 \cdot C_{10} + 2714.32629 \cdot C_{10}^2 - 995.29534 \cdot C_{10}^3 \\
& + 124.75272 \cdot C_{10}^4 - 2054.46431 \cdot C_{01} + 5163.21263 \cdot C_{10} \cdot C_{01} \\
& - 2975.23671 \cdot C_{10}^2 \cdot C_{01} + 548.11557 \cdot C_{10}^3 \cdot C_{01} + 2276.08348 \cdot C_{01}^2 \\
& - 2667.91349 \cdot C_{10} \cdot C_{01}^2 + 745.33481 \cdot C_{10}^2 \cdot C_{01}^2 - 628.30578 \cdot C_{01}^3 \\
& + 420.77853 \cdot C_{10} \cdot C_{01}^3 - 1704.54052 \cdot C_{11} + 5146.82451 \cdot C_{10} \cdot C_{11} \\
& - 3114.62815 \cdot C_{10}^2 \cdot C_{11} + 545.30936 \cdot C_{10}^3 \cdot C_{11} + 4560.05716 \cdot C_{01} \\
& \cdot C_{11} - 5961.08725 \cdot C_{10} \cdot C_{01} \cdot C_{11} + 1811.49183 \cdot C_{10}^2 \cdot C_{01} \cdot C_{11} \\
& - 2336.74279 \cdot C_{01}^2 \cdot C_{11} + 1530.42535 \cdot C_{10} \cdot C_{01}^2 \cdot C_{11} + 315.74613 \\
& \cdot C_{01}^3 \cdot C_{11} + 1977.03494 \cdot C_{11}^2 - 2966.17265 \cdot C_{10} \cdot C_{11}^2 + 1007.68127 \\
& \cdot C_{10}^2 \cdot C_{11}^2 - 2442.26545 \cdot C_{01} \cdot C_{11}^2 + 1873.6857 \cdot C_{10} \cdot C_{01} \cdot C_{11}^2 \\
& + 517.87698 \cdot C_{01}^2 \cdot C_{11}^2
\end{aligned}$$

247

248

249 *S5.13 Arruda-Boyce hyper-elastic model for NBR.*

250

$$\begin{aligned}
EF_{shear} = & 343.87777 - 870.83475 \cdot Nkt + 1037.17292 \cdot Nkt^2 - 25.42125 \cdot Nkt \cdot \lambda \\
& + 0.39898 \cdot \lambda^2
\end{aligned}$$

251

$$\begin{aligned}
EF_{comVol} = & -1919.42829 + 7508.96782 \cdot Nkt + 456.54146 \cdot Nkt^2 - 0.08931 \cdot Nkt \\
& \cdot \lambda + 0.00112 \cdot \lambda^2
\end{aligned}$$

252

$$\begin{aligned}
EF_{comp} = & 371.23109 - 1126.44011 \cdot Nkt + 1432.93383 \cdot Nkt^2 - 29.70991 \cdot Nkt \cdot \lambda \\
& + 0.43446 \cdot \lambda^2
\end{aligned}$$

253

$$\begin{aligned}
EF_{trac} = & 197.47187 + 1051.58888 \cdot Nkt - 61.52851 \cdot \lambda - 50.61817 \cdot Nkt \cdot \lambda \\
& + 2.36001 \cdot \lambda^2
\end{aligned}$$

254

$$\begin{aligned}
EF_{tens} = & 532.62137 - 851.88933 \cdot Nkt + 357.76776 \cdot Nkt^2 + 13.91383 \cdot \lambda \\
& - 0.34594 \cdot \lambda^2
\end{aligned}$$

255

256 *S5.14 Arruda-Boyce hyper-elastic model for EVA.*

257

$$\begin{aligned}
EF_{shear} = & 443.03704 - 815.96357 \cdot Nkt + 573.86517 \cdot Nkt^2 + 10.01283 \cdot \lambda \\
& - 15.063 \cdot Nkt \cdot \lambda
\end{aligned}$$

258

$$\begin{aligned}
EF_{comVol} = & -1151.42377 + 4636.76594 \cdot Nkt + 175.84276 \cdot Nkt^2 - 0.02159 \cdot \lambda \\
& - 0.04255 \cdot Nkt \cdot \lambda + 0.00117 \cdot \lambda^2
\end{aligned}$$

259

$$\begin{aligned}
EF_{comp} = & -32.04627 + 940.69416 \cdot Nkt - 20.19724 \cdot \lambda - 16.12471 \cdot Nkt \cdot \lambda \\
& + 0.74803 \cdot \lambda^2
\end{aligned}$$

260

$$\begin{aligned}
EF_{trac} = & 4.91399 + 25.53328 \cdot Nkt^2 - 1.95244 \cdot Nkt \cdot \lambda + 0.02786 \cdot \lambda^2
\end{aligned}$$



$$EF_{tens} = 496.09381 - 875.14162 \cdot Nkt + 517.78397 \cdot Nkt^2 + 7.92435 \cdot \lambda - 8.23417 \cdot Nkt \cdot \lambda$$

261

262 *S5.15 Arruda-Boyce hyper-elastic model for PUR.*

263

$$EF_{shear} = 884.10358 - 807.84821 \cdot Nkt + 18.95852 \cdot \lambda + 14.42898 \cdot Nkt \cdot \lambda - 0.6924 \cdot \lambda^2$$

264

$$EF_{comVol} = -1853.06435 + 8184.12015 \cdot Nkt - 0.06229 \cdot \lambda - 0.05012 \cdot Nkt \cdot \lambda + 0.00231 \cdot \lambda^2$$

265

$$EF_{comp} = 714.18438 - 1009.39545 \cdot Nkt + 276.74001 \cdot Nkt^2 + 18.541 \cdot \lambda + 4.47422 \cdot Nkt \cdot \lambda - 0.52967 \cdot \lambda^2$$

266

$$EF_{trac} = 192.03576 + 1036.39488 \cdot Nkt - 59.06482 \cdot \lambda - 50.614 \cdot Nkt \cdot \lambda + 2.3021 \cdot \lambda^2$$

267

$$EF_{tens} = 1104.64969 - 620.13626 \cdot Nkt + 13.57893 \cdot \lambda + 10.82928 \cdot Nkt \cdot \lambda - 0.50292 \cdot \lambda^2$$

268

269 *S5.16 Arruda-Boyce hyper-elastic model for SBR.*

270

$$EF_{shear} = 345.66083 - 758.6238 \cdot Nkt + 721.73296 \cdot Nkt^2 + 8.8817 \cdot \lambda - 17.40945 \cdot Nkt \cdot \lambda$$

271

$$EF_{comVol} = -2063.42994 + 8184.12015 \cdot Nkt - 0.06229 \cdot \lambda - 0.05012 \cdot Nkt \cdot \lambda + 0.00231 \cdot \lambda^2$$

272

$$EF_{comp} = 44.81323 + 709.16551 \cdot Nkt^2 - 31.25226 \cdot Nkt \cdot \lambda + 0.42723 \cdot \lambda^2$$

273

$$EF_{trac} = 210.08771 + 1056.59961 \cdot Nkt - 63.91641 \cdot \lambda - 48.90095 \cdot Nkt \cdot \lambda + 2.38979 \cdot \lambda^2$$

274

$$EF_{tens} = 510.44981 - 819.16068 \cdot Nkt + 482.55608 \cdot Nkt^2 + 7.95319 \cdot \lambda - 8.94834 \cdot Nkt \cdot \lambda$$

275

276

## 277 S6. Correlation (Corr), p-value, MAE and RMSE obtained for each of the polynomial models

278 Table S21. ANOVA values of "EFs" second-order polynomial models for the NBR material.

| Model         | Var.             | Corr  | p-value     | train.MAE | train.RMSE | test.MAE  | test.RMSE |
|---------------|------------------|-------|-------------|-----------|------------|-----------|-----------|
| Mooney-Rivlin | <i>EF_shear</i>  | 0.995 | 5.883E-72   | 0.0119    | 0.0242     | 0.0091    | 0.0115    |
|               | <i>EF_comVol</i> | 0.999 | 4.307E-182  | 0.0016    | 0.0021     | 0.0014    | 0.0017    |
|               | <i>EF_comp</i>   | 0.999 | 8.020E-118  | 0.0035    | 0.0055     | 0.0026    | 0.0028    |
|               | <i>EF_trac</i>   | 0.999 | 1.190E-108  | 0.0051    | 0.0073     | 0.0069    | 0.0112    |
|               | <i>EF_tens</i>   | 0.999 | 2.622E-93   | 0.0067    | 0.0092     | 0.0079    | 0.0152    |
| Arruda-boyce  | <i>EF_shear</i>  | 0.931 | 0.04746     | 0.095     | 0.110      | 0.117     | 0.154     |
|               | <i>EF_comVol</i> | 0.999 | 3.646E-17   | 2.138E-05 | 2.410E-05  | 0.0043    | 0.0049    |
|               | <i>EF_comp</i>   | 0.952 | 0.0241      | 0.071     | 0.0843     | 0.113     | 0.135     |
|               | <i>EF_trac</i>   | 0.978 | 0.00518     | 0.055     | 0.0702     | 0.105     | 0.121     |
|               | <i>EF_tens</i>   | 0.980 | 0.00431     | 0.063     | 0.0731     | 0.0339    | 0.0419    |
| Gent          | <i>EF_shear</i>  | 0.999 | 3.560E-51   | 8.130E-05 | 0.0001     | 0.0341    | 0.0356    |
|               | <i>EF_comVol</i> | 1     | 2.174E-118  | 1.426E-10 | 2.047E-10  | 0.0031    | 0.00312   |
|               | <i>EF_comp</i>   | 0.999 | 1.015E-55   | 4.020E-05 | 5.292E-05  | 0.0535    | 0.0539    |
|               | <i>EF_trac</i>   | 0.999 | 4.451E-31   | 0.0012    | 0.0016     | 0.0211    | 0.0240    |
|               | <i>EF_tens</i>   | 1     | 2.057E-108  | 3.479E-08 | 4.773E-08  | 2.079E-08 | 2.527E-08 |
| Ogden         | <i>EF_shear</i>  | 0.997 | 2.879E-06   | 0.0142    | 0.0213     | 0.0286    | 0.0353    |
|               | <i>EF_comVol</i> | 0.999 | 0.00075     | 0.01031   | 0.0124     | 0.0103    | 0.0144    |
|               | <i>EF_comp</i>   | 0.993 | 4.963E-05   | 0.0250    | 0.0329     | 0.0384    | 0.0442    |
|               | <i>EF_trac</i>   | 0.999 | 1.40198E-09 | 0.0052    | 0.0069     | 0.0416    | 0.0455    |
|               | <i>EF_tens</i>   | 0.999 | 3.27453E-08 | 0.0015    | 0.0019     | 0.0034    | 0.0051    |

279

280

281

Table S22. ANOVA values of the “EFs” second-order polynomial models for the PUR material.

| Model         | Var.             | Corr  | p-value    | train.MAE | train.RMSE | test.MAE   | test.RMSE |
|---------------|------------------|-------|------------|-----------|------------|------------|-----------|
| Monney-Rivlin | <i>EF_shear</i>  | 0.989 | 1.655E-55  | 0.0179    | 0.0325     | 0.0132     | 0.0153    |
|               | <i>EF_comVol</i> | 0.999 | 2.496E-213 | 0.00071   | 0.00094    | 0.00069    | 0.0008    |
|               | <i>EF_comp</i>   | 0.999 | 1.906E-98  | 0.00660   | 0.00851    | 0.0081     | 0.0088    |
|               | <i>EF_trac</i>   | 0.999 | 7.564E-103 | 0.00702   | 0.0092     | 0.0106     | 0.0173    |
|               | <i>EF_tens</i>   | 0.998 | 2.826E-83  | 0.0120    | 0.0149     | 0.0121     | 0.0136    |
| Arruda-boyce  | <i>EF_shear</i>  | 0.995 | 0.000295   | 0.0239    | 0.03031    | 0.0426     | 0.0457    |
|               | <i>EF_comVol</i> | 0.999 | 2.529E-18  | 9.521E-06 | 1.236E-05  | 1.638E-05  | 1.755E-05 |
|               | <i>EF_comp</i>   | 0.994 | 0.00397    | 0.0306    | 0.03552    | 0.0217     | 0.0352    |
|               | <i>EF_trac</i>   | 0.976 | 0.00621    | 0.0566    | 0.07305    | 0.1098     | 0.1251    |
|               | <i>EF_tens</i>   | 0.995 | 0.000276   | 0.0230    | 0.02990    | 0.0408     | 0.0438    |
| Gent          | <i>EF_shear</i>  | 0.999 | 1.424E-66  | 3.647E-08 | 4.974E-08  | 2.608E-08  | 3.123E-08 |
|               | <i>EF_comVol</i> | 0.999 | 1.080E-118 | 1.323E-10 | 1.900E-10  | 0.00129    | 0.00129   |
|               | <i>EF_comp</i>   | 0.999 | 5.124E-66  | 1.750E-07 | 2.339E-07  | 0.00010    | 0.00011   |
|               | <i>EF_trac</i>   | 0.999 | 5.722E-28  | 0.00392   | 0.00527    | 0.01562    | 0.0184    |
|               | <i>EF_tens</i>   | 0.999 | 1.692E-110 | 2.582E-08 | 3.537E-08  | 1.5341E-08 | 1.871E-08 |
| Ogden         | <i>EF_shear</i>  | 0.999 | 1.448E-11  | 2.628E-05 | 3.084E-05  | 0.00010    | 0.00016   |
|               | <i>EF_comVol</i> | 0.999 | 0.00027    | 0.00760   | 0.0090     | 0.00697    | 0.0098    |
|               | <i>EF_comp</i>   | 0.999 | 9.759E-08  | 0.00196   | 0.00249    | 0.00452    | 0.0068    |
|               | <i>EF_trac</i>   | 0.999 | 4.859E-10  | 0.00423   | 0.00570    | 0.01847    | 0.0248    |
|               | <i>EF_tens</i>   | 0.999 | 9.832E-16  | 1.866E-05 | 2.479E-05  | 6.927E-05  | 0.00010   |

282

283

284

285

Table S23. ANOVA values of the "EFs" second-order polynomial models for the EVA material.

| Model         | Var.      | Corr  | p-value    | train.MAE | train.RMSE | test.MAE  | test.RMSE |
|---------------|-----------|-------|------------|-----------|------------|-----------|-----------|
| Monney-Rivlin | EF_shear  | 0.99  | 6.743E-90  | 0.00712   | 0.01134    | 0.00548   | 0.00638   |
|               | EF_comVol | 0.999 | 1.504E-188 | 0.00136   | 0.00180    | 0.00122   | 0.00151   |
|               | EF_comp   | 0.999 | 1.632E-242 | 4.566E-05 | 6.382E-05  | 3.175E-05 | 3.791E-05 |
|               | EF_trac   | 0.999 | 2.041E-97  | 0.00601   | 0.00872    | 0.0071    | 0.01018   |
|               | EF_tens   | 0.999 | 3.197E-101 | 0.00536   | 0.00682    | 0.0060    | 0.00885   |
| Arruda-boyce  | EF_shear  | 0.918 | 0.065922   | 0.128     | 0.145      | 0.0700    | 0.0857    |
|               | EF_comVol | 0.999 | 3.520E-13  | 1.679E-05 | 1.917E-05  | 0.0027    | 0.0031    |
|               | EF_comp   | 0.995 | 0.000256   | 0.0226    | 0.029      | 0.0400    | 0.0429    |
|               | EF_trac   | 0.923 | 0.016074   | 0.094     | 0.1128     | 0.0856    | 0.1029    |
|               | EF_tens   | 0.939 | 0.038465   | 0.108     | 0.125      | 0.0726    | 0.0839    |
| Gent          | EF_shear  | 0.999 | 6.736E-56  | 7.231E-05 | 9.531E-05  | 0.0055    | 0.0055    |
|               | EF_comVol | 1     | 1.806E-115 | 5.851E-12 | 7.676E-12  | 0.0025    | 0.0025    |
|               | EF_comp   | 1     | 1.610E-78  | 1.732E-07 | 2.307E-07  | 4.094E-07 | 5.983E-07 |
|               | EF_trac   | 0.999 | 3.028E-33  | 0.0018    | 0.0024     | 0.0627    | 0.0643    |
|               | EF_tens   | 0.999 | 6.946E-49  | 6.629E-05 | 8.829E-05  | 0.0053    | 0.0055    |
| Ogden         | EF_shear  | 0.998 | 2.748E-11  | 0.0118    | 0.0147     | 0.0155    | 0.01807   |
|               | EF_comVol | 0.999 | 0.000654   | 0.0090    | 0.011      | 0.0094    | 0.0112    |
|               | EF_comp   | 0.999 | 1.924E-08  | 0.00121   | 0.0015     | 0.0017    | 0.0037    |
|               | EF_trac   | 0.998 | 1.114E-06  | 0.0125    | 0.017      | 0.0209    | 0.0250    |
|               | EF_tens   | 0.999 | 0.00012    | 0.00520   | 0.0065     | 0.0076    | 0.0116    |

286

287

288

Table S24. ANOVA values of the “EFs” second-order polynomial models for the SBR material.

| Model                | Var.             | Corr  | p-value    | train.MAE | train.RMSE | test.MAE  | test.RMSE |
|----------------------|------------------|-------|------------|-----------|------------|-----------|-----------|
| <b>Monney-Rivlin</b> | <i>EF_shear</i>  | 0.998 | 2.2706E-82 | 0.00801   | 0.0152     | 0.00737   | 0.0089    |
|                      | <i>EF_comVol</i> | 0.999 | 8.218E-190 | 0.00132   | 0.00175    | 0.00117   | 0.00146   |
|                      | <i>EF_comp</i>   | 0.999 | 2.258E-121 | 0.00218   | 0.00360    | 0.00154   | 0.00182   |
|                      | <i>EF_trac</i>   | 0.999 | 2.542E-143 | 0.00183   | 0.00266    | 0.0017    | 0.0023    |
|                      | <i>EF_tens</i>   | 0.999 | 1.943E-105 | 0.00480   | 0.00617    | 0.0048    | 0.0065    |
| <b>Arruda-boyce</b>  | <i>EF_shear</i>  | 0.919 | 0.0640     | 0.1311    | 0.15819    | 0.0972    | 0.1257    |
|                      | <i>EF_comVol</i> | 1     | 2.529E-18  | 9.521E-06 | 1.236E-05  | 1.638E-05 | 1.755E-05 |
|                      | <i>EF_comp</i>   | 0.956 | 0.00411    | 0.0767    | 0.0871     | 0.0577    | 0.0717    |
|                      | <i>EF_trac</i>   | 0.980 | 0.00424    | 0.0522    | 0.0669     | 0.1051    | 0.1197    |
|                      | <i>EF_tens</i>   | 0.943 | 0.0333     | 0.1079    | 0.1237     | 0.0670    | 0.0809    |
| <b>Gent</b>          | <i>EF_shear</i>  | 0.999 | 1.0974E-55 | 4.190E-05 | 5.466E-05  | 0.00918   | 0.01058   |
|                      | <i>EF_comVol</i> | 1     | 1.733E-118 | 1.391E-10 | 1.997E-10  | 0.00248   | 0.00249   |
|                      | <i>EF_comp</i>   | 0.999 | 7.114E-51  | 8.067E-05 | 0.00010    | 0.01226   | 0.01327   |
|                      | <i>EF_trac</i>   | 0.999 | 8.838E-33  | 0.00032   | 0.00043    | 0.00710   | 0.00725   |
|                      | <i>EF_tens</i>   | 0.999 | 1.291E-48  | 7.112E-05 | 9.473E-05  | 0.00813   | 0.00847   |
| <b>Ogden</b>         | <i>EF_shear</i>  | 0.998 | 4.705E-07  | 0.00978   | 0.01552    | 0.01963   | 0.02516   |
|                      | <i>EF_comVol</i> | 0.999 | 0.000569   | 0.00951   | 0.01139    | 0.00927   | 0.01281   |
|                      | <i>EF_comp</i>   | 0.995 | 1.538E-05  | 0.02249   | 0.02752    | 0.01770   | 0.02218   |
|                      | <i>EF_trac</i>   | 0.999 | 7.265E-09  | 0.00115   | 0.00154    | 0.01208   | 0.01727   |
|                      | <i>EF_tens</i>   | 0.999 | 1.304E-07  | 0.00220   | 0.0029     | 0.00711   | 0.00921   |

289

290

291 **S7. Multi-Response Optimization**

292 Tables S25, S26, S27 and S28 show the combination of  $C_i$  constants that are most appropriate  
 293 for modeling the mechanical behaviour of NBR, EVA, SBR and PUR materials according to  
 294 hyper-elastic models (Mooney-Rivlin, Arruda-Boyce, Gent and Ogden) by desirability  
 295 functions. The first column in all tables shows hyper-elastic material models that were  
 296 proposed. The second column shows the  $C_i$  constants and the  $EF_{norm}$  for each standardized  
 297 test. The third column shows the goal that was established in the optimization process for  
 298 both  $C_i$  constants and  $EF_{norm}$ . The fourth and fifth columns show, respectively, the minimum  
 299 and maximum values of  $C_i$  constants and  $EF_{norm}$  (range). The sixth column shows the degree  
 300 of importance considered in the optimization process, whereas the seventh and eighth  
 301 columns show, respectively, the optimal values obtained for the  $C_i$  constants and the  $EF_{norm}$ ,  
 302 and the desirability values.

303  
304**Table S25.** Adjustment of the  $C_i$  constants of the Hyper-elastic models for the NBR material.

| Model                | $C_i$ and $EF_{Norm,k}$ | Goal     | min     | max       | Importance | Value    | Desirability |
|----------------------|-------------------------|----------|---------|-----------|------------|----------|--------------|
| Mooney-rivlin        | C10                     | In range | -0.25   | 1.25      | 1.0        | 0.367    | 1            |
|                      | C01                     | In range | -0.3    | 1         | 1.0        | -0.069   | 1            |
|                      | C11                     | In range | 0       | 0.5       | 1.0        | 0.005    | 1            |
|                      | $EF_{Norm,Shear}$       | Min.     | 96.174  | 2241.868  | 1.0        | 96.07    | 1            |
|                      | $EF_{Norm,ComVol}$      | Min.     | 297.456 | 34666.017 | 1.0        | 2627.096 | 0.932        |
|                      | $EF_{Norm,Comp}$        | Min.     | 62.996  | 2971.651  | 1.0        | 173.942  | 0.962        |
|                      | $EF_{Norm,Trac}$        | Min.     | 1.753   | 280.073   | 1.0        | 11.888   | 0.964        |
|                      | $EF_{Norm,Tens}$        | Min.     | 63.309  | 1751.024  | 1.0        | 232.418  | 0.9          |
| Overall Desirability |                         |          |         |           |            |          | 0.951        |
| Arruda-boyce         | Nkt                     | In range | 0.26    | 0.9       | 1.0        | 0.578    | 1            |
|                      | Chain                   | In range | 2       | 25        | 1.0        | 24.644   | 1            |
|                      | $EF_{Norm,Shear}$       | Min.     | 70.357  | 392.841   | 1.0        | 67.291   | 1            |
|                      | $EF_{Norm,ComVol}$      | Min.     | 63.665  | 5208.335  | 1.0        | 2571.347 | 0.513        |
|                      | $EF_{Norm,Comp}$        | Min.     | 32.527  | 492.684   | 1.0        | 39.565   | 0.985        |
|                      | $EF_{Norm,Trac}$        | Min.     | 3.574   | 1000.113  | 1.0        | 1.282    | 1            |
|                      | $EF_{Norm,Tens}$        | Min.     | 115.47  | 457.292   | 1.0        | 292.62   | 0.482        |
| Overall Desirability |                         |          |         |           |            |          | 0.753        |
| Gent                 | E                       | In range | 0.6     | 3.7       | 1.0        | 2.144    | 1            |
|                      | inv1                    | In range | 63      | 79.5      | 1.0        | 76.465   | 1            |
|                      | $EF_{Norm,Shear}$       | Min.     | 45.332  | 269.846   | 1.0        | 45.527   | 0.999        |
|                      | $EF_{Norm,ComVol}$      | Min.     | 520.843 | 7934.909  | 1.0        | 3690.353 | 0.573        |
|                      | $EF_{Norm,Comp}$        | Min.     | 46.923  | 341.163   | 1.0        | 46.641   | 1            |
|                      | $EF_{Norm,Trac}$        | Min.     | 2.125   | 21.072    | 1.0        | 2.145    | 0.999        |
|                      | $EF_{Norm,Tens}$        | Min.     | 35.373  | 485.943   | 1.0        | 261.921  | 0.497        |
| Overall Desirability |                         |          |         |           |            |          | 0.777        |
| Ogden                | k1                      | In range | 0       | 0.5       | 1.0        | 0.254    | 1            |
|                      | k2                      | In range | -0.5    | -0.125    | 1.0        | -0.261   | 1            |
|                      | $EF_{Norm,Shear}$       | Min.     | 46      | 309.481   | 1.0        | 70.573   | 0.907        |

|                      |      |         |          |     |          |       |
|----------------------|------|---------|----------|-----|----------|-------|
| $EF_{Norm,ComVol}$   | Min. | 399.743 | 8071.295 | 1.0 | 3139.578 | 0.643 |
| $EF_{Norm,Comp}$     | Min. | 19.145  | 421.35   | 1.0 | 55.628   | 0.909 |
| $EF_{Norm,Trac}$     | Min. | 4.182   | 31.899   | 1.0 | 4.644    | 0.983 |
| $EF_{Norm,Tens}$     | Min. | 27.798  | 522.41   | 1.0 | 282.316  | 0.485 |
| Overall Desirability |      |         |          |     |          | 0.759 |

---

305  
306  
307

308

**Table S26.** Adjustment of the  $C_i$  constants of the Hyper-elastic models for the PUR material.

| Model                | $C_i$ and $EF_{Norm,k}$ | Goal     | min     | max       | Importance | Value     | Desirability |
|----------------------|-------------------------|----------|---------|-----------|------------|-----------|--------------|
| Mooney-rivlin        | C10                     | In range | -0.25   | 1.25      | 1.0        | 0.982     | 1            |
|                      | C01                     | In range | -0.3    | 1         | 1.0        | -0.056    | 1            |
|                      | C11                     | In range | 0       | 0.5       | 1.0        | 0.005     | 1            |
|                      | $EF_{Norm,Shear}$       | Min.     | 112.854 | 1654.109  | 1.0        | 111.625   | 1            |
|                      | $EF_{Norm,ComVol}$      | Min.     | 249.253 | 34970.176 | 1.0        | 13303.154 | 0.624        |
|                      | $EF_{Norm,Comp}$        | Min.     | 73.712  | 2566.555  | 1.0        | 276.739   | 0.919        |
|                      | $EF_{Norm,Trac}$        | Min.     | 1.163   | 266.489   | 1.0        | 18.319    | 0.935        |
|                      | $EF_{Norm,Tens}$        | Min.     | 152.375 | 1039.498  | 1.0        | 421.419   | 0.697        |
| Overall Desirability |                         |          |         |           |            |           | 0.821        |
| Arruda-boyce         | Nkt                     | In range | 0.26    | 0.9       | 1.0        | 0.643     | 1            |
|                      | Chain                   | In range | 2       | 25        | 1.0        | 3.75      | 1            |
|                      | $EF_{Norm,Shear}$       | Min.     | 203.456 | 825.433   | 1.0        | 460.967   | 0.586        |
|                      | $EF_{Norm,ComVol}$      | Min.     | 274.31  | 5512.494  | 1.0        | 3407.264  | 0.402        |
|                      | $EF_{Norm,Comp}$        | Min.     | 87.588  | 626.636   | 1.0        | 252.565   | 0.694        |
|                      | $EF_{Norm,Trac}$        | Min.     | 9.289   | 987.47    | 1.0        | 547.094   | 0.45         |
|                      | $EF_{Norm,Tens}$        | Min.     | 578.934 | 1051.183  | 1.0        | 775.986   | 0.583        |
|                      | Overall Desirability    |          |         |           |            |           |              |
| Gent                 | E                       | In range | 0.6     | 3.7       | 1.0        | 2.982     | 1            |
|                      | inv1                    | In range | 63      | 79.5      | 1.0        | 70.645    | 1            |
|                      | $EF_{Norm,Shear}$       | Min.     | 353.641 | 857.605   | 1.0        | 470.45    | 0.768        |
|                      | $EF_{Norm,ComVol}$      | Min.     | 249.261 | 8239.069  | 1.0        | 6276.983  | 0.246        |
|                      | $EF_{Norm,Comp}$        | Min.     | 74.689  | 665.016   | 1.0        | 207.921   | 0.774        |
|                      | $EF_{Norm,Trac}$        | Min.     | 7.661   | 34.656    | 1.0        | 7.662     | 1            |
|                      | $EF_{Norm,Tens}$        | Min.     | 684.051 | 1076.193  | 1.0        | 775.157   | 0.768        |
|                      | Overall Desirability    |          |         |           |            |           |              |
| Ogden                | k1                      | In range | 0       | 0.5       | 1.0        | 0.329     | 1            |
|                      | k2                      | In range | -0.5    | -0.125    | 1.0        | -0.499    | 1            |
|                      | $EF_{Norm,Shear}$       | Min.     | 315.165 | 897.24    | 1.0        | 453.004   | 0.763        |
|                      | $EF_{Norm,ComVol}$      | Min.     | 703.902 | 8375.454  | 1.0        | 6235.196  | 0.279        |
|                      | $EF_{Norm,Comp}$        | Min.     | 33.614  | 691.354   | 1.0        | 137.955   | 0.841        |
|                      | $EF_{Norm,Trac}$        | Min.     | 9.621   | 41.194    | 1.0        | 9.179     | 1            |
|                      | $EF_{Norm,Tens}$        | Min.     | 663.501 | 1107.37   | 1.0        | 769.026   | 0.762        |
|                      | Overall Desirability    |          |         |           |            |           |              |

309

310



311 **Table S27.** Adjustment of the  $C_i$  constants of the Hyper-elastic models for the EVA material.

| Model                | $C_i$ and $EF_{Norm,k}$ | Goal     | min     | max       | Importance | Value    | Desirability |
|----------------------|-------------------------|----------|---------|-----------|------------|----------|--------------|
| Mooney-rivlin        | C10                     | In range | -0.25   | 1.25      | 1.0        | 0.572    | 1            |
|                      | C01                     | In range | -0.3    | 1         | 1.0        | -0.292   | 1            |
|                      | C11                     | In range | 0       | 0.5       | 1.0        | 0.002    | 1            |
|                      | $EF_{Norm,Shear}$       | Min.     | 61.501  | 1893.316  | 1.0        | 153.139  | 0.95         |
|                      | $EF_{Norm,ComVol}$      | Min.     | 225.662 | 20789.563 | 1.0        | 1471.67  | 0.939        |
|                      | $EF_{Norm,Comp}$        | Min.     | 78.213  | 3245.309  | 1.0        | 137.191  | 0.981        |
|                      | $EF_{Norm,Trac}$        | Min.     | 1.193   | 69.898    | 1.0        | 3.567    | 0.965        |
|                      | $EF_{Norm,Tens}$        | Min.     | 71.945  | 1798.992  | 1.0        | 192.881  | 0.93         |
| Overall Desirability |                         |          |         |           |            |          | 0.952        |
| Arruda-boyce         | Nkt                     | In range | 0.26    | 0.9       | 1.0        | 0.567    | 1            |
|                      | Chain                   | In range | 2       | 25        | 1.0        | 15.054   | 1            |
|                      | $EF_{Norm,Shear}$       | Min.     | 73.393  | 380.402   | 1.0        | 187.217  | 0.629        |
|                      | $EF_{Norm,ComVol}$      | Min.     | 65.893  | 3164.011  | 1.0        | 1531.532 | 0.527        |
|                      | $EF_{Norm,Comp}$        | Min.     | 52.119  | 766.343   | 1.0        | 228.846  | 0.753        |
|                      | $EF_{Norm,Trac}$        | Min.     | 1.087   | 24.657    | 1.0        | 2.771    | 0.929        |
|                      | $EF_{Norm,Tens}$        | Min.     | 88.508  | 409.325   | 1.0        | 215.548  | 0.604        |
|                      | Overall Desirability    |          |         |           |            |          |              |
| Gent                 | E                       | In range | 0.6     | 3.7       | 1.0        | 2.237    | 1            |
|                      | inv1                    | In range | 63      | 79.5      | 1.0        | 63.1     | 1            |
|                      | $EF_{Norm,Shear}$       | Min.     | 65.828  | 410.551   | 1.0        | 160.167  | 0.726        |
|                      | $EF_{Norm,ComVol}$      | Min.     | 263.955 | 4795.415  | 1.0        | 2412.535 | 0.526        |
|                      | $EF_{Norm,Comp}$        | Min.     | 13.739  | 614.821   | 1.0        | 331.24   | 0.472        |
|                      | $EF_{Norm,Trac}$        | Min.     | 1.829   | 9.326     | 1.0        | 1.84     | 0.999        |
|                      | $EF_{Norm,Tens}$        | Min.     | 51.687  | 437.976   | 1.0        | 199.245  | 0.618        |
|                      | Overall Desirability    |          |         |           |            |          |              |
| Ogden                | k1                      | In range | 0       | 0.5       | 1.0        | 0.361    | 1            |
|                      | k2                      | In range | -0.5    | 0.062     | 1.0        | -0.119   | 1            |
|                      | $EF_{Norm,Shear}$       | Min.     | 77.888  | 447.312   | 1.0        | 181.346  | 0.72         |
|                      | $EF_{Norm,ComVol}$      | Min.     | 286.864 | 4877.019  | 1.0        | 1985.402 | 0.63         |
|                      | $EF_{Norm,Comp}$        | Min.     | 12.6    | 695.009   | 1.0        | 297.922  | 0.582        |
|                      | $EF_{Norm,Trac}$        | Min.     | 1.284   | 11.388    | 1.0        | 2.182    | 0.911        |
|                      | $EF_{Norm,Tens}$        | Min.     | 55.985  | 474.442   | 1.0        | 217.144  | 0.615        |
|                      | Overall Desirability    |          |         |           |            |          |              |

312

313

314

Table S28. Adjustment of the Ci constants of the Hyper-elastic models for the SBR material.

| Model                | Ci and EF <sub>Norm,k</sub> | Goal     | min     | max      | Importance | Value    | Desirability |
|----------------------|-----------------------------|----------|---------|----------|------------|----------|--------------|
| Mooney-rivlin        | C10                         | In range | -0.25   | 1.25     | 1.0        | 0.112    | 1            |
|                      | C01                         | In range | -0.3    | 1        | 1.0        | 0.152    | 1            |
|                      | C11                         | In range | 0       | 0.5      | 1.0        | 0.005    | 1            |
|                      | EF <sub>Norm,Shear</sub>    | Min.     | 91.287  | 1795.679 | 1.0        | 162.006  | 0.959        |
|                      | EF <sub>Norm,ComVol</sub>   | Min.     | 391.249 | 34759.81 | 1.0        | 2329.807 | 0.944        |
|                      | EF <sub>Norm,Comp</sub>     | Min.     | 35.444  | 3060.174 | 1.0        | 167.375  | 0.956        |
|                      | EF <sub>Norm,Trac</sub>     | Min.     | 2.145   | 293.328  | 1.0        | 4.091    | 0.993        |
|                      | EF <sub>Norm,Tens</sub>     | Min.     | 101.068 | 1774.579 | 1.0        | 275.728  | 0.896        |
| Overall Desirability |                             |          |         |          |            |          | 0.949        |
| Arruda-boyce         | Nkt                         | In range | 0.26    | 0.9      | 1.0        | 0.579    | 1            |
|                      | Chain                       | In range | 2       | 25       | 1.0        | 17.354   | 1            |
|                      | EF <sub>Norm,Shear</sub>    | Min.     | 93.858  | 281.635  | 1.0        | 127.498  | 0.821        |
|                      | EF <sub>Norm,ComVol</sub>   | Min.     | 63.944  | 5302.129 | 1.0        | 2677.111 | 0.501        |
|                      | EF <sub>Norm,Comp</sub>     | Min.     | 57.417  | 581.207  | 1.0        | 97.294   | 0.924        |
|                      | EF <sub>Norm,Trac</sub>     | Min.     | 4.017   | 1013.368 | 1.0        | -58.919  | 1            |
|                      | EF <sub>Norm,Tens</sub>     | Min.     | 128.999 | 433.737  | 1.0        | 245.892  | 0.616        |
|                      | Overall Desirability        |          |         |          |            |          |              |
| Gent                 | E                           | In range | 0.6     | 3.7      | 1.0        | 1.899    | 1            |
|                      | inv1                        | In range | 63      | 79.5     | 1.0        | 79.46    | 1            |
|                      | EF <sub>Norm,Shear</sub>    | Min.     | 96.5    | 309.763  | 1.0        | 119.881  | 0.89         |
|                      | EF <sub>Norm,ComVol</sub>   | Min.     | 427.05  | 8028.703 | 1.0        | 3091.726 | 0.649        |
|                      | EF <sub>Norm,Comp</sub>     | Min.     | 54.818  | 429.685  | 1.0        | 91.734   | 0.902        |
|                      | EF <sub>Norm,Trac</sub>     | Min.     | 3.275   | 33.698   | 1.0        | 8.386    | 0.832        |
|                      | EF <sub>Norm,Tens</sub>     | Min.     | 102.337 | 462.388  | 1.0        | 275.889  | 0.518        |
|                      | Overall Desirability        |          |         |          |            |          |              |
| Ogden                | k1                          | In range | 0       | 0.5      | 1.0        | 0.124    | 1            |
|                      | k2                          | In range | -0.5    | -0.125   | 1.0        | -0.426   | 1            |
|                      | EF <sub>Norm,Shear</sub>    | Min.     | 94.375  | 343.729  | 1.0        | 126.842  | 0.87         |
|                      | EF <sub>Norm,ComVol</sub>   | Min.     | 493.537 | 8165.088 | 1.0        | 2831.922 | 0.695        |
|                      | EF <sub>Norm,Comp</sub>     | Min.     | 32.54   | 509.873  | 1.0        | 119.565  | 0.818        |
|                      | EF <sub>Norm,Trac</sub>     | Min.     | 3.405   | 45.155   | 1.0        | 4.209    | 0.981        |
|                      | EF <sub>Norm,Tens</sub>     | Min.     | 103.401 | 498.855  | 1.0        | 284.985  | 0.541        |
|                      | Overall Desirability        |          |         |          |            |          |              |

315

316

317 S8. Validation

318

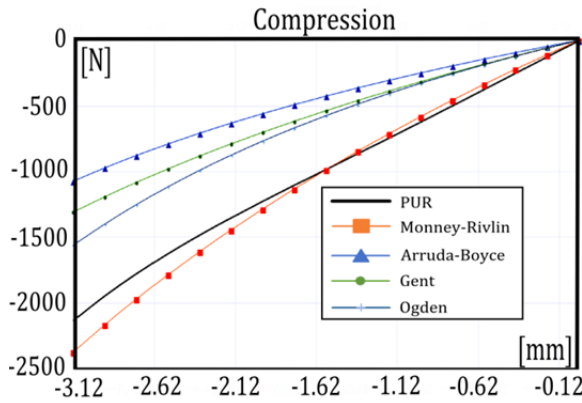

(a)

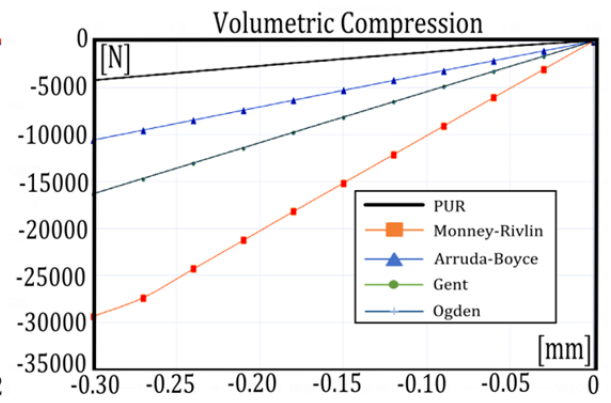

(b)

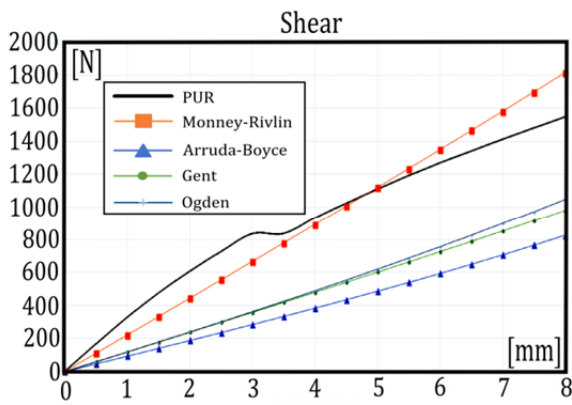

(c)

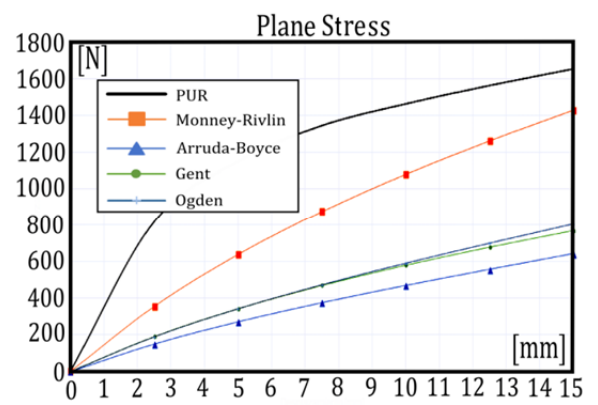

(d)

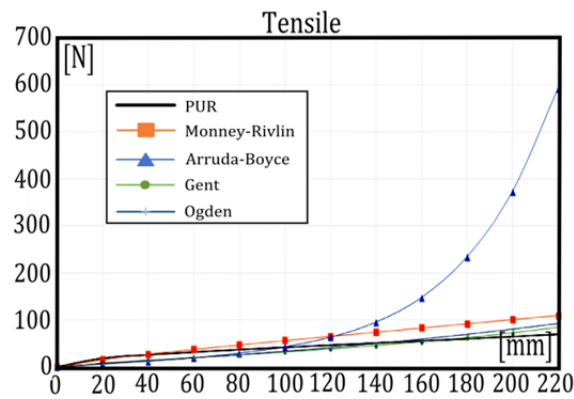

(e)

319

320

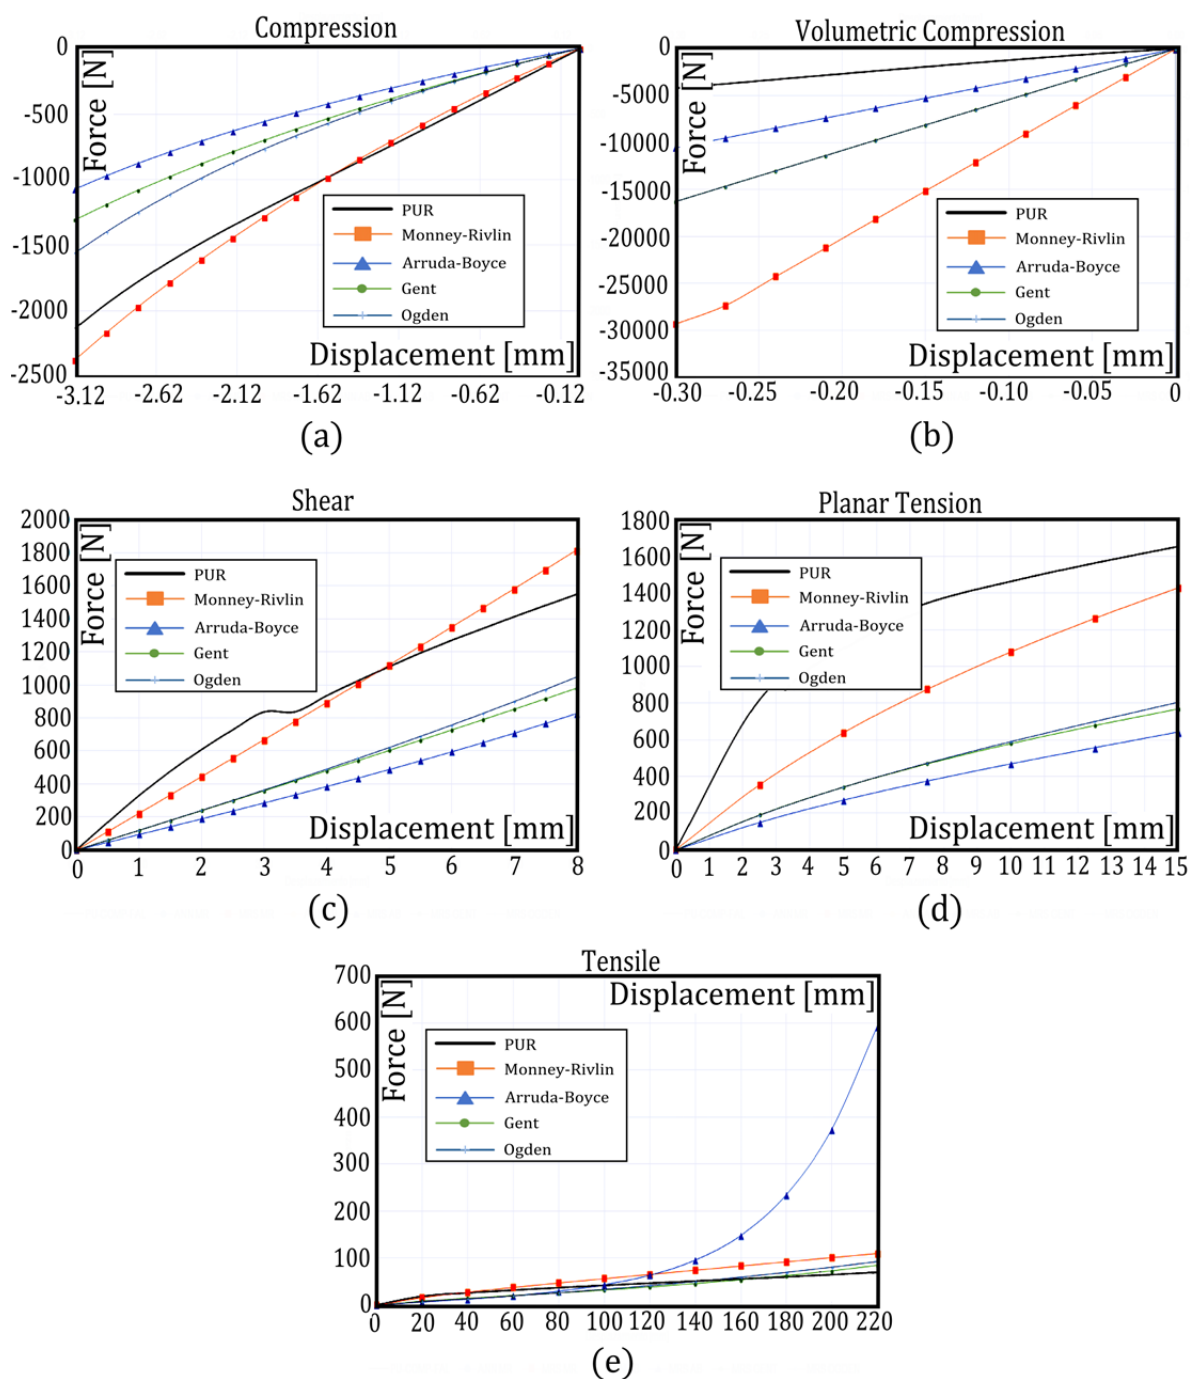

321

322

323

324

325

**Figure S14.** Force-displacement curve obtained from the FE simulations when the optimal constants  $C_i$  are compared to the force-displacement obtained experimentally for the Hyper-elastic Mooney-Rivlin model for PUR material in standardized tests: (a) Compression, (b) Volumetric Compression, (c) Shear, (d) Plane Stress and (e) Tensile.

326

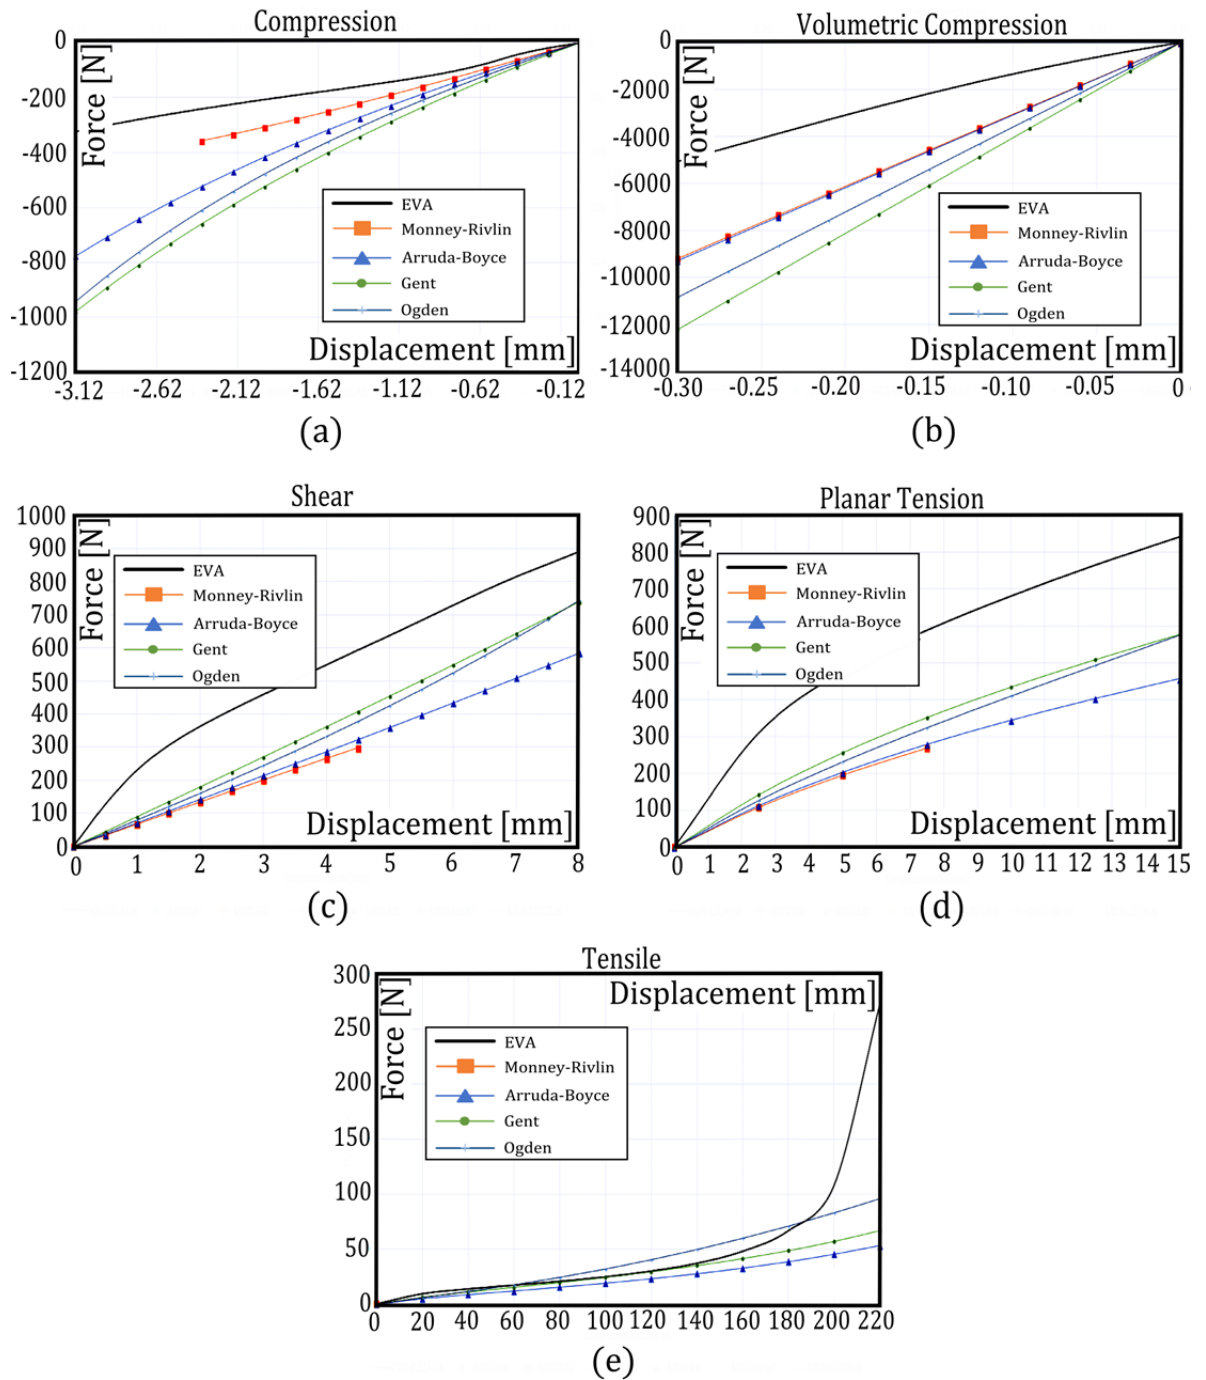

327  
 328  
 329  
 330  
 331  
 332

**Figure S15.** Force-displacement curve obtained from the FE simulations when the optimal constants  $C_i$  are compared to the force-displacement obtained experimentally for the Hyper-elastic Mooney-Rivlin model for EVA material in standardized tests: (a) Compression, (b) Volumetric Compression, (c) Shear, (d) Plane Stress and (e) Tensile.

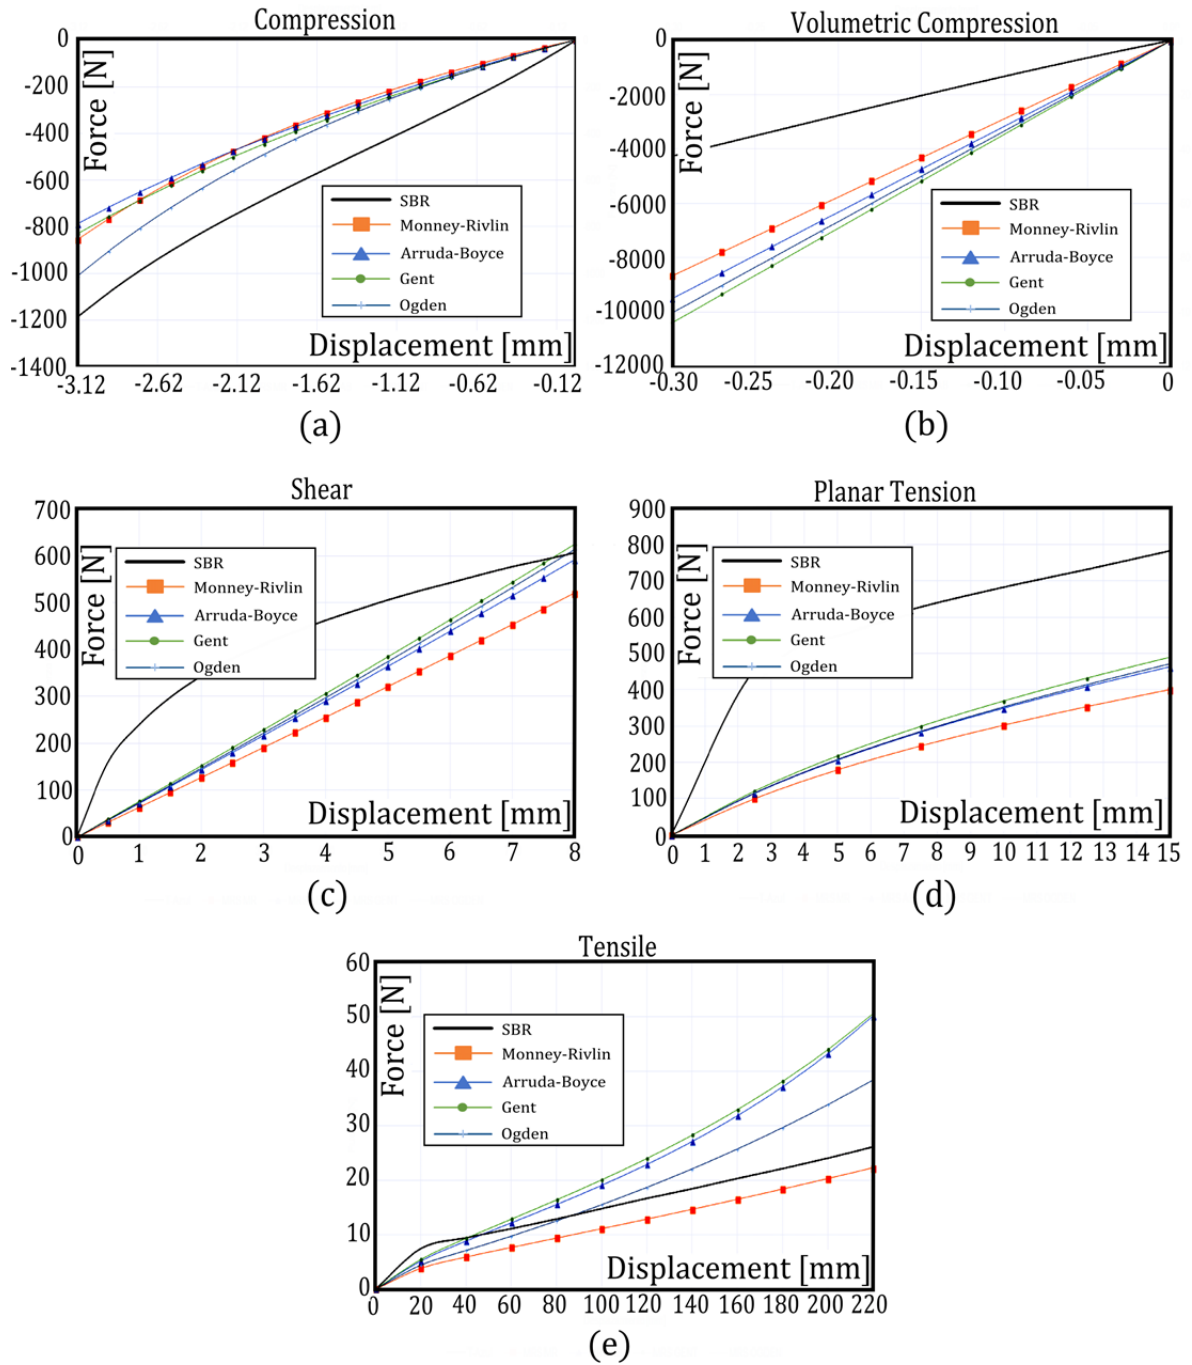

333

334

335

336

337

**Figure S16.** Force-displacement curve obtained from the FE simulations when the optimal constants  $C_i$  are compared to Vs the force-displacement obtained experimentally for Hyper-elastic Mooney-Rivlin model for SBR material in standardized tests: (a) Compression, (b) Volumetric Compression, (c) Shear, (d) Plane Stress and (e) Tensile.

338

339

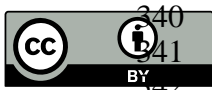

Supplement: s001 [file materials-12-01019-s001.pdf]
